1      **FAM192A/PIP30 regulates Cajal body dynamics by**  
2                    **antagonizing PA28 $\gamma$ /coilin interaction**

3  
4  
5      Jonik-Nowak B.<sup>1#</sup>, Fesquet D.<sup>1#</sup>, Baldin V.<sup>1</sup>, Méchali F.<sup>1</sup>, Bonne-Andrea C.<sup>1</sup>, De Rossi S.<sup>2</sup>,  
6      Lamond A.I.<sup>3</sup>, Boulon S.<sup>1,4\*</sup>, Coux O.<sup>1\*</sup>

7  
8      <sup>1</sup> Centre de Recherche de Biologie cellulaire de Montpellier (CRBM), UMR5237, CNRS/Université  
9      de Montpellier, Montpellier, France

10     <sup>2</sup> Montpellier Ressources Imagerie facility, Biocampus UMS3426, CNRS, Montpellier, France

11     <sup>3</sup> Centre for Gene Regulation and Expression, School of Life Sciences, Dundee, UK

12     <sup>4</sup> Previous address: Centre for Gene Regulation and Expression, School of Life Sciences, Dundee,  
13     UK

14  
15     # Contributed equally to this work

16     \* Co-corresponding authors

17

18

19

20

21

22

23

24

25

26

27     Running title: PIP30 regulates PA28 $\gamma$  and Cajal body dynamics

28     Key words: PA28 $\gamma$ ; Proteasome; Cajal body; Coilin; SILAC-based proteomics; Casein

29     Kinase 2.

30

31 ABSTRACT

32

33 PA28 $\gamma$ , a nuclear regulator of the 20S proteasome, is involved in the control of several  
34 essential cellular processes, such as cell proliferation and nuclear organization,  
35 including Cajal body dynamics. However, the mechanisms controlling PA28 $\gamma$  function in  
36 the regulation of nuclear architecture are not known. Here we identify through a SILAC-  
37 based proteomics approach a specific and prominent interaction partner of PA28 $\gamma$ ,  
38 called FAM192A/PIP30. We show that the PA28 $\gamma$ /PIP30 complex is stabilized by Casein  
39 Kinase 2-dependent phosphorylation of the PIP30 C-terminal region. PIP30 depletion  
40 reduces the number of Cajal bodies in human cells similar to PA28 $\gamma$  overexpression.  
41 Importantly, PIP30 depletion also results in the accumulation of PA28 $\gamma$  in residual Cajal  
42 body structures, which correlates with an increased interaction between PA28 $\gamma$  and  
43 coilin. Altogether our data identify the first regulator of PA28 $\gamma$ , which plays a critical role  
44 in Cajal body dynamics by antagonizing the formation of PA28 $\gamma$ /coilin complexes.

45

46 INTRODUCTION  
47

48 Proteasome Activator 28 subunit  $\gamma$  (PA28 $\gamma$ ), also known as 11S regulator complex  
49 subunit  $\gamma$  or REG $\gamma$ , is a nuclear regulator of the proteasome (Mao et al., 2008). It  
50 functions as a homoheptamer, which, like the other proteasome regulators, opens the  
51 gate of the 20S core proteasome complex upon binding and thereby allows the  
52 substrates to enter the catalytic chamber (Kish-Trier and Hill, 2013). In contrast with  
53 the well-characterized 19S proteasome regulatory particle, which specifically recognizes  
54 polyubiquitylated proteins, unfolds them and targets them for degradation by the 20S  
55 core proteasome (Tomko and Hochstrasser, 2013), PA28 $\gamma$ , which does not possess any  
56 ATPase activity, is believed to activate the degradation of protein substrates in an ATP-  
57 and ubiquitin-independent manner (Chen et al., 2007; Li et al., 2007, 2006). In the past  
58 decade, various PA28 $\gamma$  protein substrates have been identified, including several cell  
59 cycle inhibitors, such as p21<sup>Cip1</sup>, p16<sup>INK4</sup> and p19<sup>ARF</sup> (Chen et al., 2007; Kobayashi et al.,  
60 2013; Li et al., 2007), suggesting an important role of PA28 $\gamma$  in the control of cell  
61 proliferation. In agreement, PA28 $\gamma$   $-/-$  mice display growth retardation and PA28 $\gamma$   $-/-$   
62 MEF cells slightly accumulate in the G1 phase of the cell cycle (Moriishi et al., 2007;  
63 Murata et al., 1999). Furthermore, PA28 $\gamma$  was shown to be critical for tumorigenesis (L.  
64 Li et al., 2015) and to have anti-apoptotic roles, especially via inhibiting caspase activity  
65 when overexpressed (Moncsek et al., 2015). Consistently, overexpression of PA28 $\gamma$  is  
66 observed in many cancers (Chen et al., 2013; He et al., 2012; Li et al., 2012; Okamura et  
67 al., 2003; Roessler et al., 2006; Xiong et al., 2014) and correlates with adverse clinical  
68 prognosis (Chai et al., 2014; J. Li et al., 2015). Other specific PA28 $\gamma$  substrates include  
69 SRC-3/AIB (Li et al., 2006), HCV-core protein (Moriishi et al., 2007, 2003),  
70 PTTG1/securin-TR $\beta$  (Ying et al., 2006), Smurf1 (Nie et al., 2010), SirT1 and SirT7 (Dong

71 et al., 2013; Sun et al., 2016), CK1 $\delta$  (Li et al., 2013) and c-myc (S. Li et al., 2015), which  
72 link PA28 $\gamma$  to a broad range of essential cellular pathways. However, so far no common  
73 structural features, or post-translational modifications, have been uncovered that would  
74 explain how these substrates can be specifically recognized by PA28 $\gamma$  and transferred to  
75 the catalytic chamber of the 20S core proteasome.

76 PA28 $\gamma$  also participates in the regulation of nuclear organization. In particular, PA28 $\gamma$   
77 localizes on chromosomes in telophase and plays an important role in the maintenance  
78 of chromosomal stability (Zannini et al., 2008). In addition, we, and others, have shown  
79 that PA28 $\gamma$  affects the dynamics of various nuclear bodies, including PML bodies, nuclear  
80 speckles, nucleoli and Cajal bodies (CBs). For example, PA28 $\gamma$  depletion alters the  
81 organization of nuclear speckles and the recruitment of splicing factors to transcription  
82 sites (Baldin et al., 2008), increases the number of PML bodies (Zannini et al., 2009) and  
83 stimulates ribosomal DNA transcription in the nucleolus (Sun et al., 2016), whereas  
84 PA28 $\gamma$  overexpression leads to the disruption of CBs (Cioce et al., 2006).

85 Importantly, PA28 $\gamma$  plays a crucial role in the cellular stress response. Its expression  
86 level is increased upon hydrogen peroxide treatment, possibly to enhance the  
87 degradation of oxidatively damaged proteins (Pickering and Davies, 2012) and its  
88 association with the 20S core proteasome is increased upon proteotoxic stress,  
89 including oxidative stress (Zhang et al., 2015) and proteasome inhibition (Welk et al.,  
90 2016). In addition, PA28 $\gamma$  is recruited to DNA damage sites, where it plays a role in DNA  
91 repair (Levy-Barda et al., 2011), and it is required for UV-C-induced dispersion of CBs  
92 (Cioce et al., 2006). In agreement, PA28 $\gamma$  depletion leads to an increased cellular  
93 sensitivity to genotoxic stress (Levy-Barda et al., 2011; Moncsek et al., 2015).  
94 Furthermore, PA28 $\gamma$  depletion sensitizes cells to glucose deprivation/energy starvation,

95 via SirT7 stabilization, which prevents reduction of ribosomal RNA expression and ATP  
96 consumption (Sun et al., 2016). Altogether, these observations strongly support an  
97 important role of PA28 $\gamma$  in the regulation of nuclear dynamics in response to different  
98 types of stresses. However the mechanisms underlying the specific function of PA28 $\gamma$  in  
99 these processes and how it is regulated are currently unknown.

100 CBs are evolutionary conserved subnuclear compartments that bring together factors  
101 involved in the processing and assembly of spliceosomal small nuclear RNPs (snRNPs)  
102 and small nucleolar RNPs (snoRNPs), including telomerase, in the processing of histone  
103 pre-mRNAs and in the recycling of snRNPs (Cioce and Lamond, 2005; Machyna et al.,  
104 2015; Matera and Wang, 2014; Nizami et al., 2010; Trinkle-Mulcahy and Sleeman, 2016).  
105 CBs are characterized by the presence of coilin. Of note, the depletion of this protein  
106 marker induces the dispersion of CBs and alters snRNP biogenesis and RNA splicing  
107 fidelity (Wang et al., 2016). Interestingly, in zebrafish, coilin depletion is lethal and the  
108 defect in snRNP biogenesis is mostly accountable for this phenotype (Strzelecka et al.,  
109 2010). In addition, it has been shown that incomplete and defective snRNPs bind to  
110 coilin and accumulate in CBs (Novotný et al., 2015). Altogether, these observations  
111 support the idea that coilin and CBs are crucial players in the quality control  
112 mechanisms that proofread the processing and assembly of nuclear small non-coding  
113 RNPs (Machyna et al., 2015).

114 Apart from coilin, many factors, including SMN and WRAP53, accumulate in CBs and are  
115 essential for their integrity (Girard et al., 2006; Lemm et al., 2006; Mahmoudi et al.,  
116 2010). The molecular crowding of these various components in CBs increases the rate of  
117 snRNP assembly by 10 fold (Novotný et al., 2011) and orchestrates genome-wide  
118 clustering of snRNA, snoRNA and histone genes, which are physically associated with  
119 CBs (Dundr et al., 2007; Nizami et al., 2010; Wang et al., 2016). CB formation follows a

120 dynamic self-organization process (Kaiser et al., 2008) and depends on the active  
121 transcription of snRNA and snoRNA genes. Consistently, CB integrity is very sensitive to  
122 the cellular environment. For example, CBs are disrupted upon local dynamic force on  
123 the cellular surface, transcription inhibition and DNA-damage treatment (Cioce et al.,  
124 2006; Hebert, 2013; Poh et al., 2012). Interestingly, we identified PA28 $\gamma$  as an essential  
125 player required for UV-C disruption of CBs, correlating with an increased interaction  
126 between PA28 $\gamma$  and coilin (Cioce et al., 2006).

127 Altogether, these observations strongly support an important role of PA28 $\gamma$  in the  
128 regulation of nuclear dynamics, notably in response to different types of stresses, even  
129 though its specific function and regulation in these processes are still poorly  
130 understood. To identify new interaction partners of PA28 $\gamma$  that may participate in the  
131 regulation of nuclear organization, and particularly CB dynamics, we used an approach  
132 combining endogenous PA28 $\gamma$  immunoprecipitation and SILAC (Stable Isotope Labeling  
133 by Amino-Acids in Cell Culture)-based quantitative proteomics (Boulon et al., 2010).  
134 Here we report the identification and characterization of FAM192A/PIP30 (PA28 $\gamma$   
135 Interacting Protein 30kDa), a specific interactor of PA28 $\gamma$ . We show that the Casein  
136 Kinase 2 (CK2)-dependent phosphorylation of the evolutionary conserved C-terminal  
137 domain of PIP30 is important for the formation and/or the stabilization of the  
138 PIP30/PA28 $\gamma$  complex. Importantly, PIP30 depletion leads to a decrease in CB number,  
139 the unusual accumulation of PA28 $\gamma$  in residual CBs and an increased interaction  
140 between PA28 $\gamma$  and coilin. Altogether, our results suggest that PIP30 regulates the  
141 function of PA28 $\gamma$  in CB dynamics by modulating its association with coilin.

142

143 RESULTS

144

145 *Identification of a novel interactor of PA28 $\gamma$*

146 To discover new interactors of PA28 $\gamma$ , we used a high throughput approach combining  
147 endogenous PA28 $\gamma$  immunoprecipitation (IP) and SILAC-based quantitative proteomics  
148 that allows for the reliable identification of specific partners above the non-specific  
149 background of contaminants (Boulon et al., 2010). This strategy enabled us to compare  
150 proteins eluted either in the control or in PA28 $\gamma$  IP (Fig. 1A, left panel). Proteins  
151 specifically interacting with the bait, i.e., PA28 $\gamma$ , were expected to show Heavy/Light  
152 (H/L) ratios higher than 1. In contrast, proteins non-specifically binding to the beads  
153 (experimental contaminants) were expected to show H/L ratios close to 1. Proteins with  
154 ratios lower than 1 were mostly environmental contaminants, such as keratins.

155 In this experiment, 68 human protein groups containing at least two unique peptides  
156 were quantified and visualized by plotting  $\log_2(\text{H/L ratio})$  versus  $\log_2(\text{H intensity})$  (Fig.  
157 1B). PA28 $\gamma$  itself was found with a H/L SILAC ratio close to 15. Other proteins with high  
158 H/L SILAC ratios include splicing, transcription and chromatin-associated factors (Table  
159 S1), which is in agreement with the role of PA28 $\gamma$  in chromatin dynamics and nuclear  
160 speckle organization (Baldin et al., 2008; Zannini et al., 2008). Surprisingly however,  
161 only one of the 20S core proteasomal subunits was found, suggesting either that the  
162 interaction between PA28 $\gamma$  and the 20S core proteasome was not stable in our  
163 experimental conditions and/or that most PA28 $\gamma$  is not associated with the 20S  
164 proteasome in the nucleoplasm, in accordance with previous studies (Gao et al., 2004;  
165 Welk et al., 2016). Amongst the most enriched interactors of PA28 $\gamma$  was FAM192A, a  
166 poorly annotated protein of unknown cellular function that has not been previously

**Figure 1**

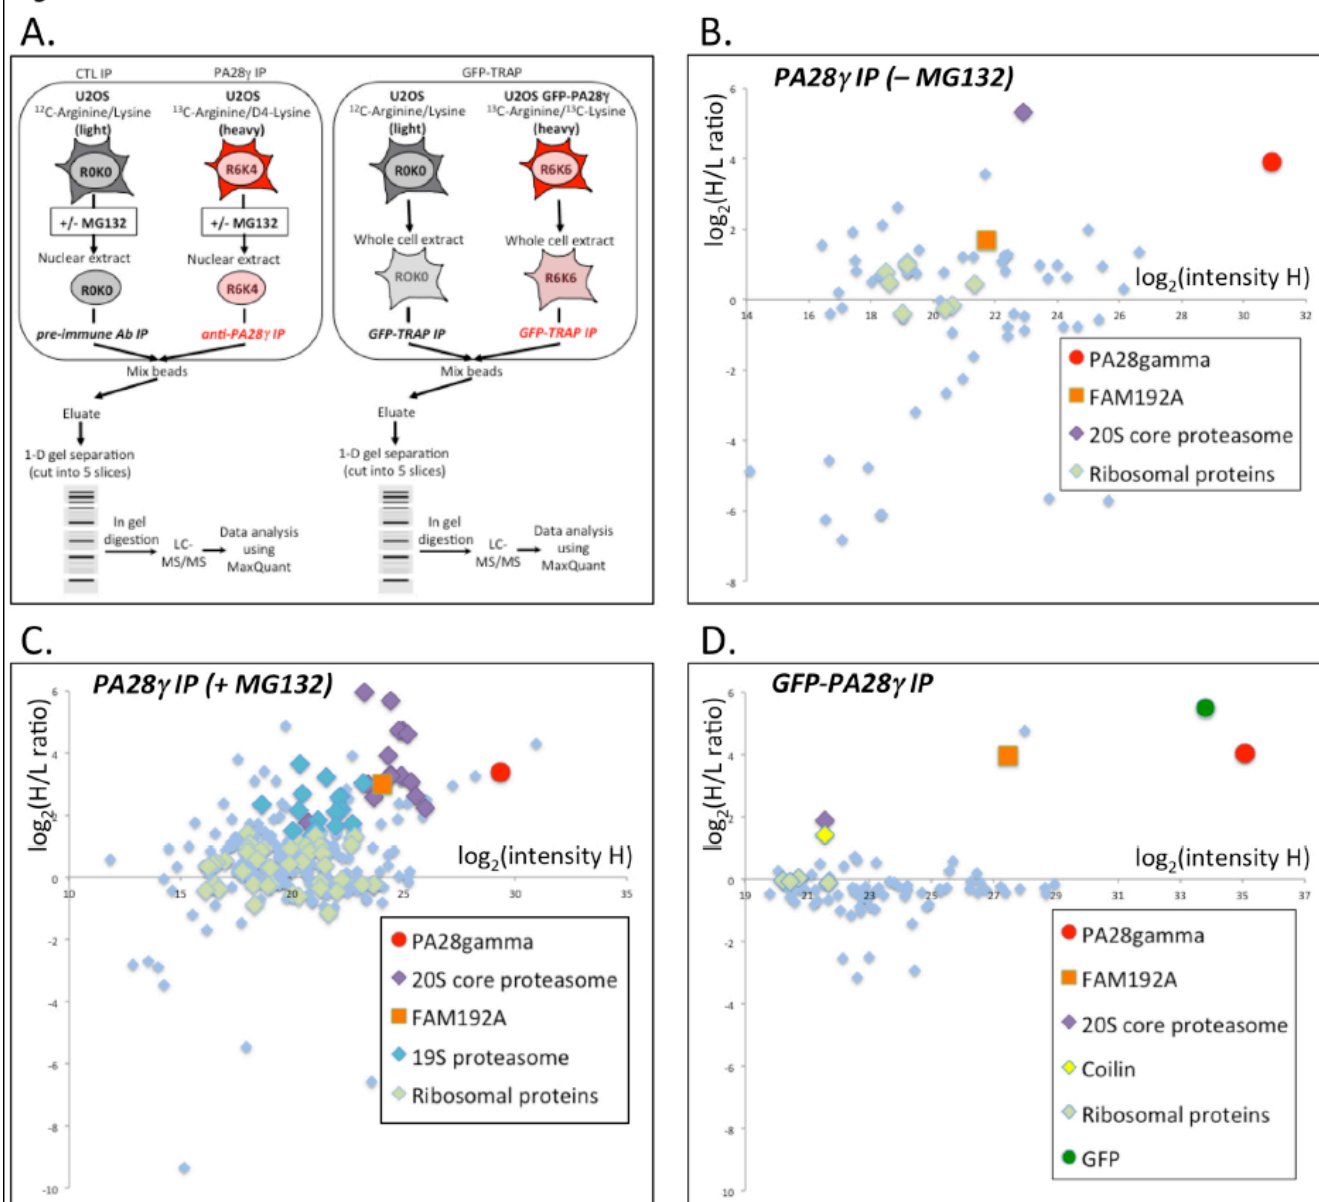

167  
168  
169  
170  
171  
172  
173  
174  
175  
176  
177  
178

**Fig. 1: Identification of a novel interaction partner of PA28γ by a SILAC IP approach**

**A. Design of the SILAC IP experiments.** For both endogenous PA28γ IPs, control IPs were performed with nuclear extracts prepared from U2OS cells grown in “light”, i.e., unlabeled (R<sub>0</sub>K<sub>0</sub>) medium, while endogenous PA28γ IPs were performed with nuclear extracts prepared from U2OS cells grown in “heavy” (R<sub>6</sub>K<sub>4</sub>) medium. In addition, in the second experiment, all cells were treated with MG132 (25 μM) for 7 h. For the GFP-PA28γ IP, the control IP was performed with a whole cell extract prepared from U2OS cells grown in “light”, i.e., unlabeled (R<sub>0</sub>K<sub>0</sub>) medium, while the GFP-TRAP IP of GFP-PA28γ was performed with a whole cell extract prepared from U2OS cells grown in “heavy” (R<sub>6</sub>K<sub>6</sub>) medium. After the immunoprecipitation steps, eluted proteins were *in-gel*



179 digested with trypsin and peptides analyzed by Liquid Chromatography Tandem Mass  
180 Spectrometry (LC-MS/MS) and quantified using MaxQuant.

181 B. **Data of the SILAC IP of endogenous PA28 $\gamma$  (untreated cells)** visualized by plotting  
182  $\log_2(\text{H/L})$  versus  $\log_2(\text{H intensity})$  values for all 68 human protein groups quantified by  
183 MaxQuant that contained at least two unique peptides identified.

184 C. **Data of the SILAC PA28 $\gamma$  IP data (cells treated with MG132)** visualized by plotting  
185  $\log_2(\text{H/L})$  versus  $\log_2(\text{H intensity})$  values for all 267 human protein groups quantified by  
186 MaxQuant with a minimum of 2 unique peptides.

187 D. **Data of the SILAC GFP-TRAP IP of GFP-PA28 $\gamma$**  visualized by plotting  $\log_2(\text{H/L})$  versus  
188  $\log_2(\text{H intensity})$  values for all 86 protein groups quantified by MaxQuant with a  
189 minimum of 2 unique peptides.

190 In all graphs, the bait (PA28 $\gamma$ ) is indicated by a red dot. A novel stable interaction partner of  
191 PA28 $\gamma$ , called FAM192A, which is identified in all three IPs with high H/L SILAC ratios, is  
192 indicated by an orange square. The different subunits of the 20S core proteasome are  
193 indicated by violet diamonds, and the subunits of the 19S regulatory particle by blue  
194 diamonds. Ribosomal proteins, which can be considered here as non-specific interaction  
195 partners, are indicated by green diamonds.

196

197 characterized, except for the fact that its expression is induced during skeletal muscle  
198 atrophy (Waddell et al., 2016).

199 To identify proteins that may interact with the PA28 $\gamma$ /20S proteasome complexes, we  
200 repeated the same experiment in the presence of MG132 (Fig. 1A, left panel and Fig. 1C).  
201 In this experiment, 267 human protein groups were quantified (Fig. 1C and Table S2). As  
202 anticipated, all 14  $\alpha$  and  $\beta$  subunits of the 20S core proteasome were found with high  
203 H/L SILAC ratios this time (violet squares, Fig. 1C), confirming that proteasome  
204 inhibition enhances the interaction between the 20S core proteasome and PA28  
205 complexes (Shibatani et al., 2006; Welk et al., 2016). It is noteworthy that many subunits  
206 of the 19S activator of the proteasome were also identified with high SILAC H/L ratios,  
207 suggesting the presence of PA28 $\gamma$  in hybrid proteasomes, with the 20S core binding  
208 PA28 $\gamma$  at one end and the 19S regulatory particle at the other end. Interestingly,  
209 FAM192A was again identified among the proteins with the highest SILAC ratios in this  
210 co-IP experiment, as well as in the GFP-PA28 $\gamma$  SILAC pull-down that we performed in  
211 parallel (Fig. 1A, right panel, Fig. 1D and Table S3). Of note, coilin was also identified  
212 with a high SILAC ratio in the GFP-PA28 $\gamma$  SILAC pull-down. In conclusion, FAM192A was  
213 identified in three distinct experimental settings as a major and specific interaction  
214 partner of PA28 $\gamma$ .

215 Although FAM192A is characterized by the presence of an evolutionary conserved N-  
216 terminal 100 amino acids domain called NIP30 (NEFA-interacting nuclear protein 30  
217 kDa) domain (Fig. 3A), its molecular and cellular functions are unknown. To investigate  
218 FAM192A biological roles, we first produced a stable U2OS cell line overexpressing GFP-  
219 FAM192A and analyzed GFP-FAM192A interaction partners by a SILAC-based GFP-  
220 pulldown approach (Fig. 2A, top panel). The 364 human protein groups quantified in  
221 this experiment were visualized by plotting  $\log_2$ (H/L ratio) versus  $\log_2$ (intensity H) (Fig.

222 2A, bottom panel). Interestingly, PA28 $\gamma$  was identified as the most abundant partner of  
223 FAM192A. All these observations showing a stable interaction between FAM192A and  
224 PA28 $\gamma$  are consistent with a functional link between these two proteins, which was  
225 further confirmed in this study. Therefore, since the biological relevance of the name  
226 NIP30, which is associated to the FAM192A protein in databases, is unclear, we propose  
227 to rename this protein 'PIP30', i.e., PA28 $\gamma$  Interacting Protein of  $\approx$  30 kDa.

228

### 229 *PA28 $\gamma$ and PIP30 interact in the nucleus*

230 To help characterize the function of PIP30, we produced and purified a rabbit polyclonal  
231 antibody raised against recombinant full-length PIP30. Western blot analysis of U2OS  
232 total cell extracts with this antibody revealed a band migrating at an apparent molecular  
233 weight of 35 kDa (Fig. 2B left panel), higher than that predicted by PIP30 cDNA  
234 sequence, i.e., 28.9 kDa. However, both this band and the nuclear signal observed by  
235 indirect immunofluorescence (Fig.2B, right panel) were lost upon PIP30 depletion by  
236 siRNAs (Fig. 2B, left and right panels), demonstrating the specificity of this antibody. In  
237 conclusion, endogenous PIP30 is a nucleoplasmic protein, similarly to PA28 $\gamma$ , that  
238 migrates at an apparent molecular weight of 35 kDa in western blot analyses.

239 To investigate the subcellular location of the PA28 $\gamma$ /PIP30 complex, we next performed  
240 Proximity Ligation Assays (PLA), using either the combination of PIP30 and PA28 $\gamma$   
241 antibodies or PIP30 antibody alone, as a negative control (Fig. 2C). This approach  
242 showed that PIP30 and PA28 $\gamma$  interact in the nucleus, without any evident accumulation  
243 of the PIP30/PA28 $\gamma$  complex in specific subnuclear domains (Fig. 2C).

244 To further characterize the association between PA28 $\gamma$  and PIP30 *in cellulo*, we  
245 performed endogenous PIP30 and PA28 $\gamma$  immunoprecipitation assays using whole cell

**Figure 2**

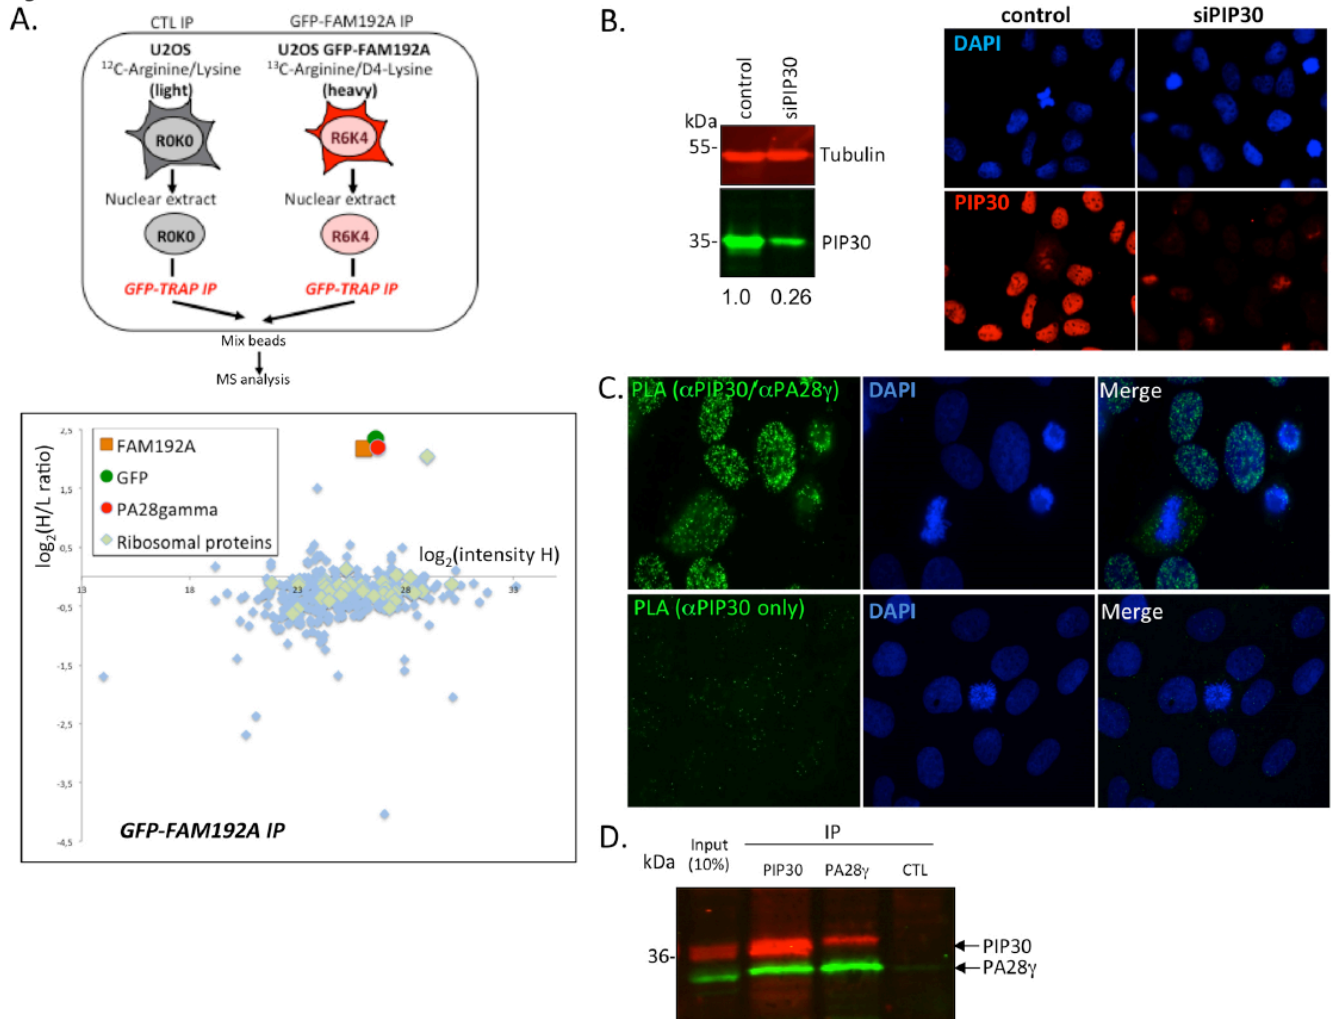

246

247 **Fig. 2: FAM192A/PIP30 interacts with PA28 $\gamma$  in the cell nucleus**

248 **A. SILAC GFP-TRAP IP of GFP-FAM192A/PIP30. Top panel: Design of the experiment.** A  
 249 double labeling strategy was applied, using U2OS cells stably overexpressing GFP-  
 250 FAM192A/PIP30. The control IP was performed with a nuclear extract prepared from  
 251 WT U2OS cells grown in “light”, i.e., unlabeled (R<sub>0</sub>K<sub>0</sub>) medium, while the GFP-  
 252 FAM192A/PIP30 IP was performed with a nuclear extract prepared from GFP-  
 253 FAM192A/PIP30 U2OS cells grown in “heavy” (R<sub>6</sub>K<sub>4</sub>) medium. **Bottom panel:** Data of the  
 254 SILAC GFP-TRAP IP of GFP-FAM192A/PIP30 were visualized by plotting log<sub>2</sub>(H/L)  
 255 versus log<sub>2</sub>(intensity H) values for all 364 protein groups quantified by MaxQuant with a  
 256 minimum of 2 unique peptides. The bait (GFP-FAM192A/PIP30) is indicated by an  
 257 orange square (peptides for FAM192A/PIP30) and a green dot (peptides for GFP).  
 258 PA28 $\gamma$  is identified with a high H/L SILAC ratio and indicated by a red dot. As in Fig. 1,  
 259 ribosomal proteins, which can be considered here as non-specific interaction partners,  
 260 are indicated by green diamonds.

- 261 B. ***Validation of the polyclonal anti-FAM192A/PIP30 antibody.*** Cell extracts from U2OS  
262 cells treated with either control or FAM192A/PIP30 siRNAs for 48 h were analyzed by  
263 western blotting and indirect immunofluorescence, using indicated antibodies.
- 264 C. ***FAM192A/PIP30 interacts with PA28 $\gamma$  in the nucleus.*** Proximity ligation assay (PLA)  
265 was performed on U2OS cells with mouse anti-PA28 $\gamma$  and rabbit affinity purified anti-  
266 FAM192A/PIP30 primary antibodies. Green dots reveal places where PA28 $\gamma$  and  
267 FAM192A/PIP30 are in close proximity, potentially in a complex (top panel). As a  
268 negative control, coverslips with only anti-FAM192A/PIP30 antibody were used (bottom  
269 panel).
- 270 D. ***A modified form of endogenous FAM192A/PIP30 interacts with endogenous PA28 $\gamma$***   
271 ***in cells.*** U2OS cell extracts were subjected to immunoprecipitations with anti-  
272 FAM192A/PIP30, anti-PA28 $\gamma$  and control antibodies as described in Materials and  
273 Methods, and analyzed by western blotting to detect the presence of endogenous  
274 FAM192A/PIP30 (red) and PA28 $\gamma$  (green).  
275

276 extracts prepared from U2OS cells. PIP30 was specifically co-immunoprecipitated with  
277 PA28 $\gamma$ . Reciprocally, PA28 $\gamma$  was co-purified with PIP30 (Fig. 2D). Of note, at least 50% of  
278 each protein were associated with the other, confirming that PIP30 can be considered as  
279 a major interaction partner of PA28 $\gamma$ . In addition, two protein bands were often detected  
280 for endogenous PIP30 (Fig. 2D), which may reveal the existence of a post-translationally  
281 modified form of the protein. Interestingly, only the slower migrating form of PIP30 was  
282 co-purified with PA28 $\gamma$ , suggesting that this modification might be involved in the  
283 formation/stabilization of the PIP30/PA28 $\gamma$  complex (Fig. 2D). Altogether, our results  
284 reveal that the PIP30/PA28 $\gamma$  complex is located in the nuclear compartment and that the  
285 formation of the PIP30/PA28 $\gamma$  complex *in cellulo* may be regulated by post-translational  
286 modifications of PIP30.

287

#### 288 *Characterization of PA28 $\gamma$ binding motif in PIP30 sequence*

289 We analyzed the region of PIP30 that is responsible for PA28 $\gamma$  binding by building  
290 several PIP30 truncation mutants, which allowed us to demonstrate that the C-terminal  
291 domain of PIP30 is critical for PA28 $\gamma$  binding (Fig. 3A). Therefore, we generated a GFP-  
292 PIP30 201-254 truncation mutant, thereafter named GFP-PIP30-H201. As shown in Fig.  
293 3B, we observed that GFP-PIP30-H201 is able to interact with PA28 $\gamma$ , demonstrating  
294 that the last 54 amino acids of PIP30 are necessary and sufficient for PA28 $\gamma$  binding.

295

#### 296 *The C-terminal part of PIP30 is phosphorylated by Casein Kinase 2*

297 Given that a putative post-translational modification of PIP30 might be important for  
298 the interaction between PA28 $\gamma$  and PIP30, as mentioned above, we closely examined the  
299 C-terminal region of PIP30 and identified a short, serine-rich and acidic sequence

**Figure 3**

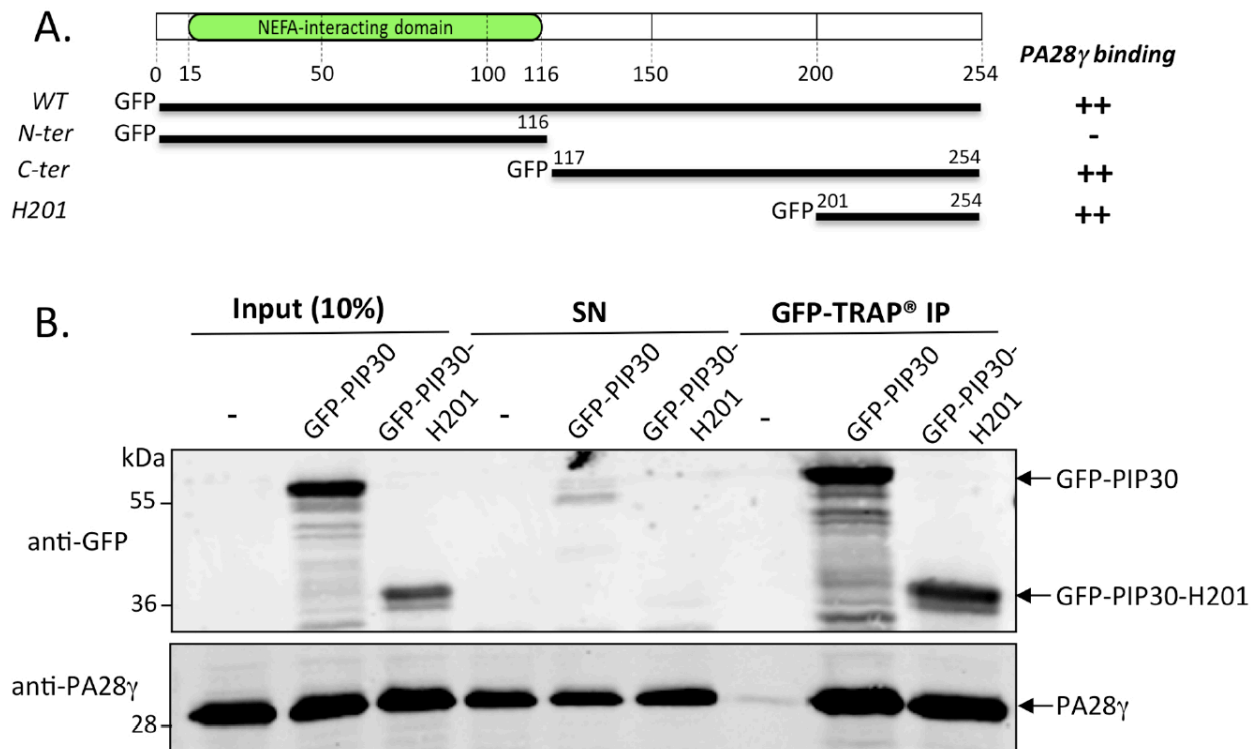

300

301 **Fig. 3: PA28 $\gamma$  interacts with the C-terminal region of PIP30.**

302 **A. Analysis of the interaction between several GFP-PIP30 truncation mutants and**

303 **PA28 $\gamma$ .** GFP pull-down experiments were performed in U2OS cells to immunoprecipitate

304 the overexpressed GFP-PIP30 truncation mutants illustrated in the figure, and the

305 presence of co-eluted endogenous PA28 $\gamma$  was analyzed by western blot. Co-IP results are

306 summarized on the right of the figure.

307 **B. The last 54 amino acids of PIP30 are necessary and sufficient for the interaction**

308 **with PA28 $\gamma$ .** GFP-PIP30-H201 truncation mutant was transiently overexpressed in U2OS

309 cells and pulled-down using GFP-TRAP®. The presence of co-immunoprecipitated

310 PA28 $\gamma$  was assessed by western blot. Non-transfected cells were used as a negative

311 control and cells transfected with wild type GFP-PIP30 as a positive control. Input

312 represents 10% of the total extract that has been incubated with the beads.

313

314 located between amino acids 219 and 232 (SGSSDSESSSDSEG) that is well conserved  
315 across evolution, from worm to human (Fig. 4A, black box). This sequence contains a  
316 tandem repeat of two SDSE motifs, which correspond to canonical consensus sites for  
317 CK2 (consensus site: S/T-X-X-E/D/pS), with putative phosphorylated serine residues  
318 being located at positions 222 and 228 (Fig. 4A) (Cesaro and Pinna, 2015; Meggio and  
319 Pinna, 2003). Indeed, we could show that GST-PIP30-H201, but not GST, can be  
320 phosphorylated by commercial, recombinant CK2 *in vitro* (Fig. 4B), demonstrating that  
321 the C-terminal region of PIP30 is a substrate of CK2.

322 To map the PIP30 residues that are modified by CK2, we inserted several point  
323 mutations in GST-PIP30-H201, either by replacing both putative phosphorylated  
324 serines, S<sub>222</sub> and S<sub>228</sub>, by alanine residues (mutant SS-AA), or by converting the acidic  
325 residues within the two CK2 consensus motifs into basic lysine residues (mutants  
326 D<sub>223</sub>E<sub>225</sub>-KK and D<sub>229</sub>E<sub>231</sub>-KK, respectively) (Fig. 4A). The latter mutations are known to  
327 disrupt CK2 substrate recognition (Cesaro and Pinna, 2015). These mutants, together  
328 with GST and wild type GST-PIP30-H201, were similarly tested using *in vitro*  
329 phosphorylation assays. As anticipated, the mutations of negatively charged residues in  
330 D<sub>223</sub>E<sub>225</sub>-KK and D<sub>229</sub>E<sub>231</sub>-KK mutants strongly reduced their phosphorylation by CK2, as  
331 compared with wild type GST-PIP30-H201, while the GST-PIP30-H201 SS-AA mutant  
332 was only partially phosphorylated by CK2 (Fig. 4C). These results confirmed that serine  
333 residues 222 and/or 228 can be phosphorylated by CK2 *in vitro* and show that the acidic  
334 residues present in this region are critical for CK2 phosphorylation. However, given that  
335 the mutation of both S<sub>222</sub> and S<sub>228</sub> did not completely abolish PIP30-H201  
336 phosphorylation, we hypothesize that other residues within the C-terminal domain may  
337 also be phosphorylated by CK2. This is consistent both with the observation that CK2  
338 can phosphorylate residues that are located at positions n-1 and/or n-3 upstream the



Figure 4

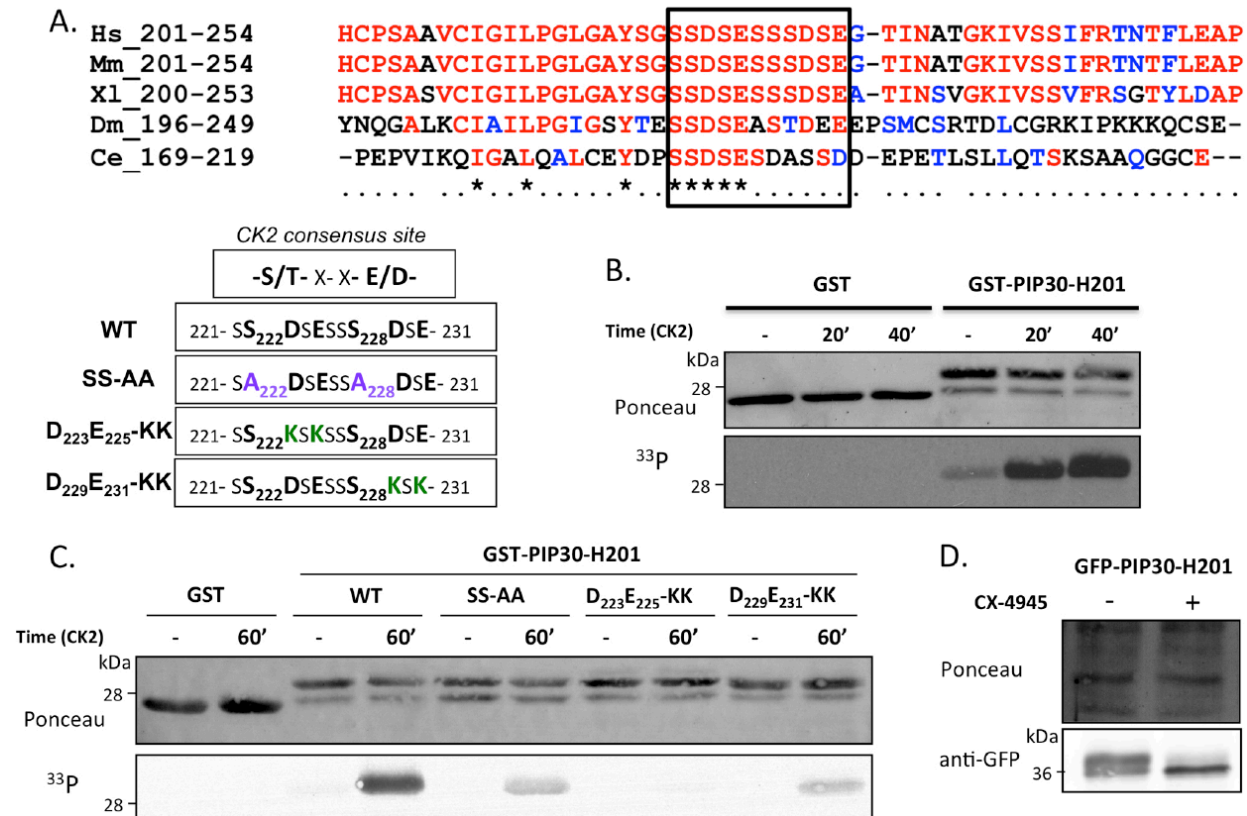

339

340 **Fig. 4: The C-terminal region of PIP30 is phosphorylated by Casein Kinase 2 *in vitro* and *in***  
 341 ***cellulo***

342 **A. The 221-SSDSESSSDSE-231 serine-rich region of PIP30 (black box) is conserved from**  
 343 ***C. elegans* to human and contains two typical consensus sites for CK2.** Sequences of  
 344 SS-AA, D<sub>223</sub>E<sub>225</sub>-KK and D<sub>229</sub>E<sub>231</sub>-KK PIP30 mutants are indicated, with the mutated  
 345 residues appearing in violet (SS-AA) and in green (D<sub>223</sub>E<sub>225</sub>-KK and D<sub>229</sub>E<sub>231</sub>-KK).  
 346 UniProtKB accession numbers are as follows : Hs Q9GZU8; Mm : Q91WE2; Xl: Q7ZYN4;  
 347 Dm: Q7JWU9; Ce: O17594.

348 **B. The GST-PIP30-H201 truncation mutant is phosphorylated by CK2 *in vitro***

349 **C. Point mutations of the acidic residues in the CK2 motifs strongly reduce the**  
 350 **phosphorylation of GST-PIP30-H201 *in vitro*.** Purified GST, GST-PIP30-H201 and GST-  
 351 PIP30-H201 mutants were incubated with CK2, in the presence of [<sup>33</sup>P]-ATP for the  
 352 indicated times. The presence of GST-tagged proteins was revealed by Ponceau and their  
 353 phosphorylation was detected by autoradiography.

354 **D. The inhibition of CK2 prevents the phosphorylation of GFP-PIP30-H201 *in cellulo*.**  
 355 U2OS cells were transiently transfected with GFP-PIP30-H201 and then either treated,  
 356 or not, with CX-4945 CK2 inhibitor (10 μM) for 24 h. After SDS-PAGE, GFP-PIP30-H201  
 357 was visualized by western blot using an anti-GFP antibody.

358 acidic residues (Meggio and Pinna, 2003), which is the case for S222, S228 and several  
359 other serine residues in the serine-rich region of PIP30, and with the well-documented  
360 property of CK2 to catalyze the generation of phosphoserine stretches (Cesaro and  
361 Pinna, 2015).

362 To verify whether the PIP30 C-terminus is also phosphorylated by CK2 *in cellulo*, cells  
363 transiently expressing GFP-PIP30-H201 were either treated, or not, with the selective  
364 CK2 inhibitor CX-4945 (Pierre et al., 2011) and GFP-PIP30-H201 was analyzed by  
365 western blotting. Interestingly, in the absence of CK2 inhibitor, we observed two bands  
366 for GFP-PIP30-H201 (Fig. 4D), as previously shown for endogenous PIP30 (Fig. 2D). In  
367 the presence of CK2 inhibitor, the slow-migrating band disappeared while the fast-  
368 migrating band became stronger (Fig. 4D), consistent with the upper band  
369 corresponding to the phosphorylated form and the lower band corresponding to the  
370 non-phosphorylated form of the PIP30-H201 fragment. As shown and discussed below,  
371 a similar result is obtained for the endogenous PIP30 protein. Therefore, we conclude  
372 that CK2 inhibition reduces the phosphorylation of PIP30-H201, confirming that the C-  
373 terminal region of PIP30 is phosphorylated in a CK2-dependent manner in cells.

374

375 *CK2-dependent phosphorylation of PIP30 is important for its interaction with PA28 $\gamma$*

376 Given that PIP30 is phosphorylated in a region that is critical for PA28 $\gamma$  binding, we next  
377 considered whether PIP30 phosphorylation might influence the formation/stabilization  
378 of the PIP30/PA28 $\gamma$  complex. To test this hypothesis, recombinant GST and GST-PIP30-  
379 H201 were either phosphorylated, or not, by CK2 and then incubated with purified and  
380 active recombinant PA28 $\gamma$ . The amount of PA28 $\gamma$  co-isolated with GST-tagged proteins  
381 after pull-down was analyzed by western blotting (Fig. 5A, left panel). We observed that

382 PA28 $\gamma$  preferentially interacts with CK2-phosphorylated GST-PIP30-H201 (Fig. 5A, left  
383 panel).

384 We then performed the same assay with previously described GST-PIP30-H201 mutants  
385 SS-AA, D<sub>223</sub>E<sub>225</sub>-KK and D<sub>229</sub>E<sub>231</sub>-KK, which were pre-incubated with CK2, and then  
386 PA28 $\gamma$ , before pull-down. Interestingly, the interaction between PA28 $\gamma$  and all three  
387 GST-PIP30-H201 mutants was impaired, as compared with wild-type GST-PIP30-H201  
388 (Fig. 5A, right panel), showing that CK2 phosphorylation of the PIP30 C-terminus plays  
389 an important role in stabilizing the PIP30/PA28 $\gamma$  complex.

390 Next, we analyzed the interaction of PA28 $\gamma$  with the same mutants (in the context of  
391 GFP-fused PIP30 full-length protein) in cells. U2OS cells were transfected with either  
392 wild type GFP-PIP30, -SS-AA, -D<sub>223</sub>E<sub>225</sub>-KK and -D<sub>229</sub>E<sub>231</sub>-KK PIP30 mutants or a  
393 truncated mutant, GFP-PIP30 1-199, unable to interact with PA28 $\gamma$ . The co-  
394 immunoprecipitation of GFP-tagged proteins and endogenous PA28 $\gamma$  was analyzed by  
395 western blotting. As expected, PA28 $\gamma$  was co-immunoprecipitated with wild type GFP-  
396 PIP30, but not with the GFP-PIP30 1-199 truncation mutant (Fig. 5B). Interestingly, the  
397 amount of PA28 $\gamma$  co-immunoprecipitated with GFP-PIP30 SS-AA was lower than with  
398 wild type GFP-PIP30, and almost null with D<sub>229</sub>E<sub>231</sub>-KK (Fig. 5B) and D<sub>223</sub>E<sub>225</sub>-KK (Fig.  
399 S1) acidic mutants. Thus, mutations altering the CK2 consensus site and therefore  
400 inhibiting PIP30 phosphorylation, consistently decrease its ability to form a stable  
401 complex with PA28 $\gamma$  in cells. It is noteworthy that the mutation of acidic residues had a  
402 stronger impact on PA28 $\gamma$  binding than the mutation of serines 222 and 228 (Fig. 5B),  
403 which reflects the absolute requirement of these residues for PIP30 interaction with  
404 CK2 and/or PA28 $\gamma$ .

405

Figure 5

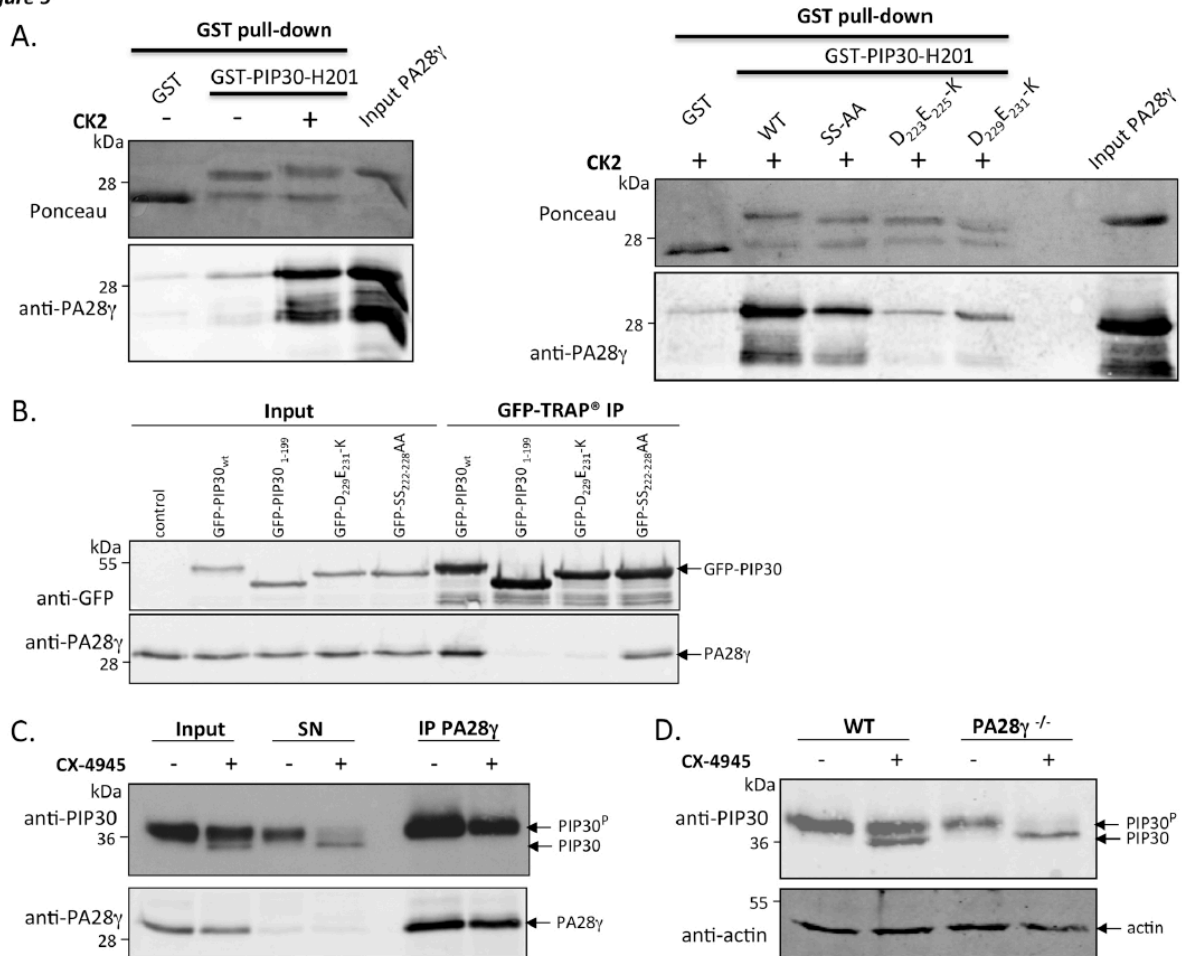

406  
407  
408

409 **Fig. 5: The CK2-dependent phosphorylation of PIP30 C-terminal region is important for**  
410 **the interaction between PIP30 and PA28 $\gamma$**

411 **A. The phosphorylation of GST-PIP30-H201 by CK2 is important for its interaction with**  
412 **PA28 $\gamma$  in vitro.** Left panel: GST and GST-PIP30-H201 were either phosphorylated, or  
413 not, by CK2, incubated with recombinant PA28 $\gamma$  and then pulled-down using glutathione  
414 sepharose beads. The presence of co-eluted PA28 $\gamma$  was analyzed by western blot using  
415 an anti-PA28 $\gamma$  antibody. Right panel: Point mutations in the CK2 motif of GST-PIP30-  
416 H201 strongly reduce the interaction between GST-PIP30-H201 and PA28 $\gamma$ .

417 **B. Point mutations in the CK2 motif of GFP-PIP30 strongly reduce the interaction**  
418 **between GFP-PIP30 and PA28 $\gamma$  in cellulo.** U2OS cells were transiently transfected with  
419 wild type and various mutants of PIP30 fused to GFP. GFP-tagged proteins were pulled-  
420 down using GFP-TRAP® beads and the presence of co-immunoprecipitated PA28 $\gamma$  was  
421 assessed by western blot. Wild type GFP-PIP30 was used as a positive control, GFP-  
422 PIP30 1-199 mutant as a negative control.

423 **C. *PA28 $\gamma$  interacts with the phosphorylated form of endogenous PIP30 in cellulo.***

424 Endogenous PA28 $\gamma$  was immunoprecipitated from U2OS cells either treated, or not, with  
425 CX-4945 (10  $\mu$ M) for 24 h. The presence of co-immunoprecipitated PA28 $\gamma$  was assessed  
426 by western blot. The input and unbound (SN) fractions were also analyzed. After CX-  
427 4945 treatment, two bands appear for endogenous PIP30, the phosphorylated form  
428 (PIP30<sup>P</sup>) and the unphosphorylated form (PIP30), as indicated.

429 **D. *The association between PA28 $\gamma$  and PIP30 protects PIP30 from dephosphorylation.***

430 Wild type and PA28 $\gamma$  <sup>-/-</sup> U2OS cells were either treated, or not, with CX-4945 (10  $\mu$ M) for  
431 24 h and the PIP30 PAGE migration profile was analyzed by western blot. As in Fig. 5C,  
432 the phosphorylated form (PIP30<sup>P</sup>) and the unphosphorylated form of PIP30 are  
433 indicated.

434

435

436

437

438 Finally, we immunoprecipitated PA28 $\gamma$  from U2OS cells, either treated, or not, with CX-  
439 4945. In the control cell extract, endogenous PIP30 appeared as only one band, most  
440 likely corresponding to the phosphorylated form of PIP30 (Fig. 5C). After CX-4945  
441 treatment, a lower band, corresponding to the dephosphorylated form of PIP30,  
442 appeared. Interestingly, only the upper band of PIP30 was retrieved upon PA28 $\gamma$   
443 immunoprecipitation (Fig. 5C), consistent with PA28 $\gamma$  predominantly interacting with  
444 the CK2-phosphorylated form of PIP30 and far less with the non-phosphorylated one.  
445 Intriguingly, only a minor fraction of endogenous PIP30 was dephosphorylated upon  
446 CK2 inhibition (Fig. 5C). We hypothesize that the phosphorylation of endogenous PIP30  
447 might be stabilized by its interaction with PA28 $\gamma$ . To check this, we compared the effect  
448 of CK2 inhibition on PIP30 phosphorylation in both wild-type and PA28 $\gamma$   $-/-$  U2OS cells  
449 (Fig. S2A, left panel). These cells were either treated, or not, with CX-4945 and the PIP30  
450 migration profile in SDS-PAGE was analyzed by western blotting (Fig. 5D). In PA28 $\gamma$   $-/-$   
451 cells, contrary to U2OS cells, the lower PIP30 band was predominantly present upon  
452 CK2 inhibition (Fig. 5D), suggesting that first, PIP30 phosphorylation is PA28 $\gamma$ -  
453 independent and second, that the association between PA28 $\gamma$  and PIP30 protects PIP30  
454 from dephosphorylation. This was confirmed by the fact that, in contrast to free PIP30,  
455 i.e., not associated to PA28 $\gamma$ , PA28 $\gamma$ -bound PIP30 could not be dephosphorylated by  $\lambda$ -  
456 phosphatase (Fig. S2B). Altogether, our results show that PA28 $\gamma$  predominantly binds  
457 the phosphorylated form of PIP30, and that once the complex is formed and stabilized, it  
458 may sterically hinder phosphatases from accessing PIP30 phosphorylation sites and  
459 thus protect PIP30 from dephosphorylation.

460

461 *PIP30 affects Cajal body dynamics*

462 To investigate the biological significance of this newly characterized interaction  
463 between PA28 $\gamma$  and PIP30, we checked whether PIP30 depletion could alter the known  
464 function of PA28 $\gamma$  in CB dynamics, since we have previously shown that PA28 $\gamma$   
465 overexpression leads to the disruption of CBs in different cell types (Cioce et al., 2006).  
466 To compare the effect of PIP30 and PA28 $\gamma$  depletion on CB integrity, we produced U2OS  
467 PA28 $\gamma$   $-/-$  and PIP30  $-/-$  cells using the CAS9/CRISPR gene editing technology (Fig. S2A,  
468 left and right panels). U2OS PIP30  $-/-$  cells did not show obvious proliferation defects, as  
469 assessed by videomicroscopy and flow cytometry analyses, suggesting that PIP30, like  
470 PA28 $\gamma$ , is not essential for cell viability in normal growth conditions. The cellular content  
471 of CBs was investigated by immunofluorescence combined to an automated image  
472 analysis, which measured the number, the mean size and the mean intensity of CBs per  
473 cell nucleus, CBs being defined here as endogenous coilin dots whose intensity is  
474 superior to a certain threshold (see Material and Methods). The results are presented in  
475 Fig. 6.

476 First, we found that the majority of wild-type U2OS cells display CBs (80%), with an  
477 average of 2-3 CBs per nucleus, as reviewed in (Morris, 2008). Second, we observed that,  
478 unlike PA28 $\gamma$  overexpression, PA28 $\gamma$  depletion had no effect on the percentage of CB  
479 positive cells (approximately 80%). However, CBs were more numerous (often more  
480 than 3 CBs per nucleus) and slightly smaller in U2OS PA28 $\gamma$   $-/-$  cells as compared with  
481 wild-type U2OS (Fig. 6). In contrast, PIP30 depletion induced a significant reduction in  
482 the percentage of CB positive cells (down to 40%). In addition, the average number of  
483 residual CBs per nucleus in PIP30  $-/-$  cells was strongly decreased (1-2 CBs per nucleus).  
484 This shows that CB formation and/or stability is impaired upon PIP30 depletion,

485



Figure 6

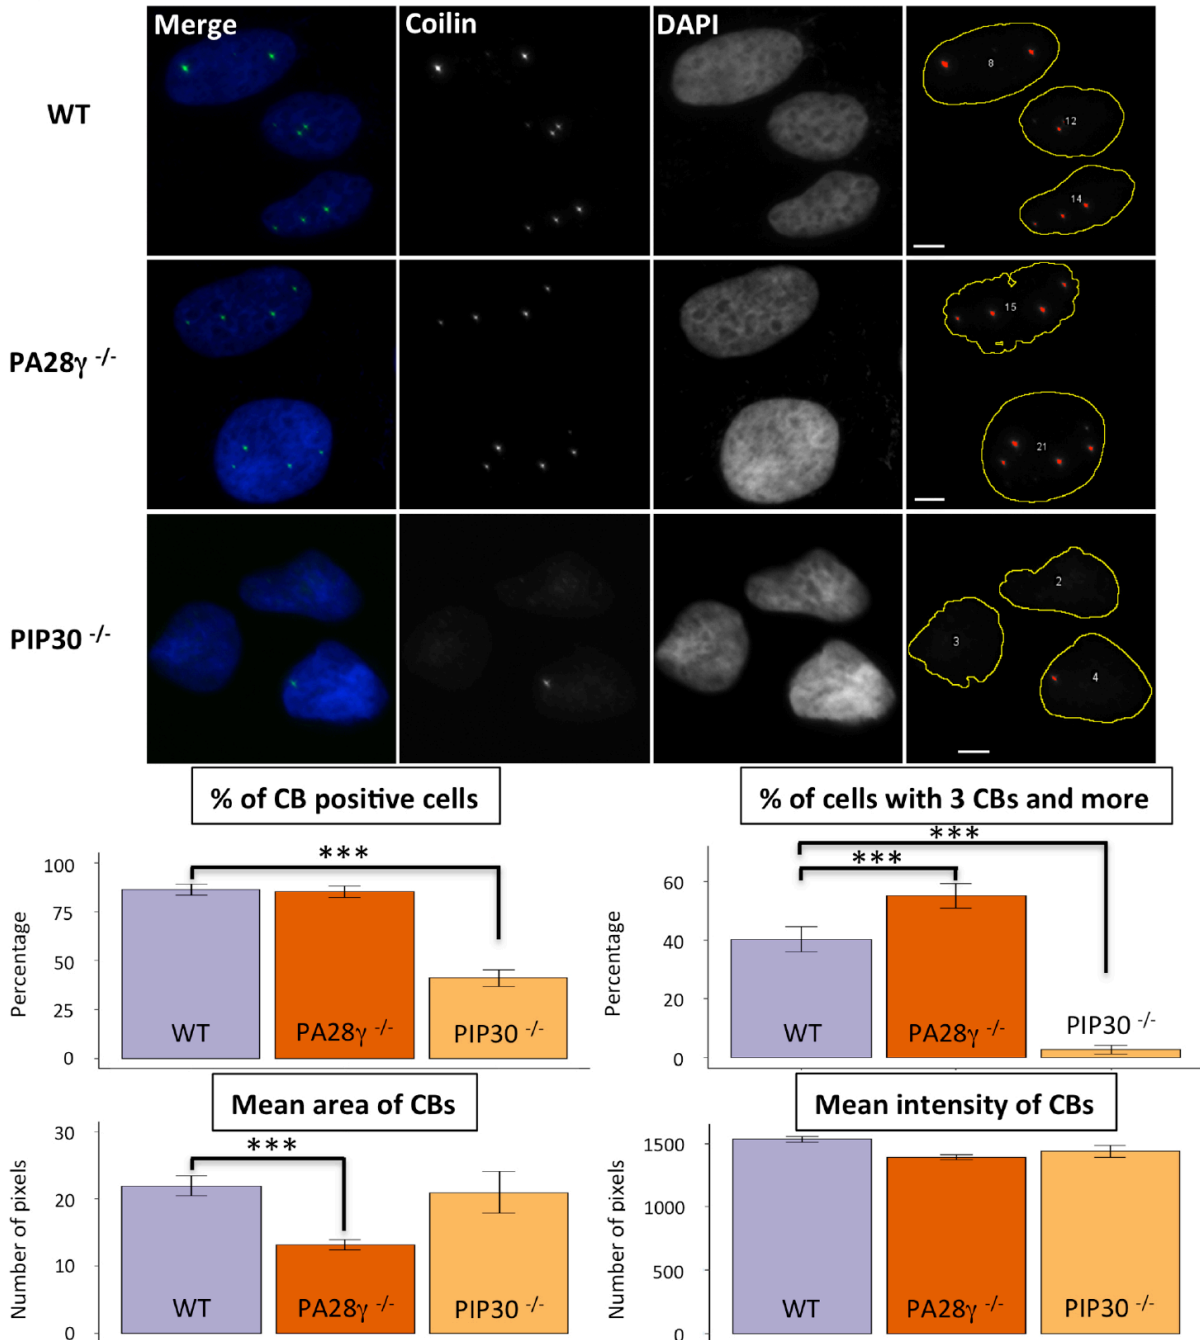

486

487 **Fig. 6: PA28 $\gamma$  and PIP30 depletions have differential effects on CB dynamics.** Wild type,  
488 PA28 $\gamma$ <sup>-/-</sup> and PIP30<sup>-/-</sup> U2OS cells were analyzed by immunofluorescence. The DAPI signal was  
489 used to delineate the nuclei, each nucleus being considered as a Region of Interest (ROI)  
490 (delineated by a yellow line in the right panels). The coilin signal (red dots in the right panels)  
491 was used to quantify the number, the mean size and the mean intensity of CBs per nucleus, as  
492 summarized in the graphs (see Materials and Methods for details). Data represent the mean of  
493 two independent experiments (n= 526 WT, 532 PA28 $\gamma$ <sup>-/-</sup> and 503 PIP30<sup>-/-</sup> cells). Bars, 10  $\mu$ m.  
494 Asterisks \*\*\* indicate p-values < 0,001.



495 whereas PA28 $\gamma$  depletion has an opposite effect, suggesting that PIP30 could modulate  
496 the function of PA28 $\gamma$  in the regulation of CB dynamics.

497

498 *PIP30 depletion induces the accumulation of PA28 $\gamma$  in Cajal bodies*

499 Interestingly, we observed that PIP30 depletion, whether accomplished either by RNA  
500 interference or by knock-out of the gene, induced, in a fraction of cells, the accumulation  
501 of PA28 $\gamma$  in nuclear dots, which were not detectable in control cells (Fig. 7A, green  
502 panels). These PA28 $\gamma$  dots could clearly be considered as residual CBs, as they all  
503 colocalized with coilin and disappeared upon coilin knockdown (Fig. 7A, red panels).  
504 Reciprocally, all residual CBs contained PA28 $\gamma$ . Of note, PA28 $\gamma$  not only colocalized with  
505 coilin in those nuclear dots, but also with other proteins known to concentrate in CBs,  
506 such as WRAP53 (also named TCAB1 or WDR79) (Fig. S3A). Interestingly, the  
507 overexpression of GFP-PIP30 in PIP30-depleted cells abrogated the accumulation of  
508 PA28 $\gamma$  in CBs (Fig. S3B), therefore demonstrating that the accumulation of PA28 $\gamma$  in CBs  
509 is indeed due to the absence of PIP30 in these cells.

510 To check whether the 20S core proteasome accumulated in CBs together with PA28 $\gamma$ , we  
511 analyzed the localization of endogenous  $\alpha$ 4 subunit of the 20S core proteasome in  
512 PIP30-depleted cells. Although PA28 $\gamma$  accumulated in the residual CBs in these cells, as  
513 expected, we could not detect any accumulation of  $\alpha$ 4 subunit in these structures (Fig.  
514 7B). Interestingly, bortezomib treatment, which is known to inhibit proteasome activity  
515 and to increase the association between PA28 $\gamma$  and the 20S core proteasome (Welk et  
516 al., 2016), interfered with the accumulation of PA28 $\gamma$  in residual CBs upon PIP30  
517 depletion (Fig. 7C). Altogether, these results indicate that PA28 $\gamma$  is mostly not associated  
518 with the 20S core proteasome in the residual CB structures observed in PIP30-depleted

Figure 7

A.

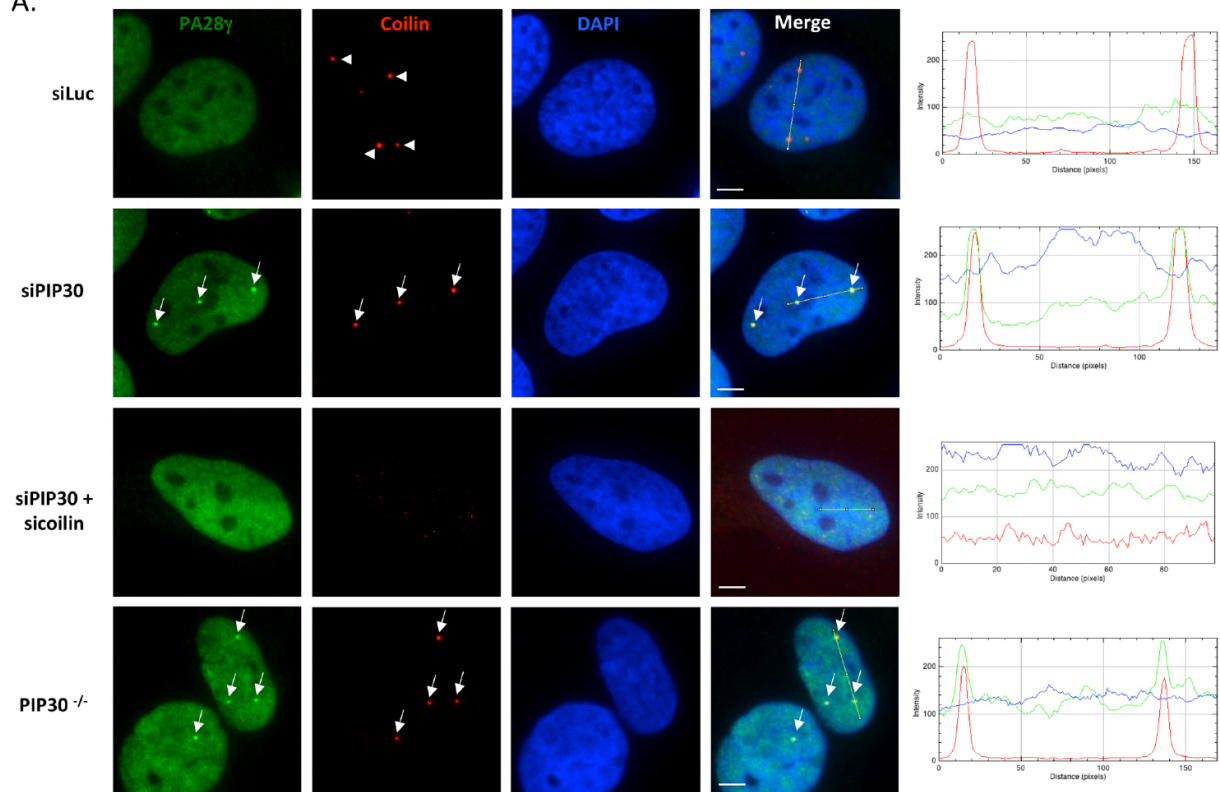

B.

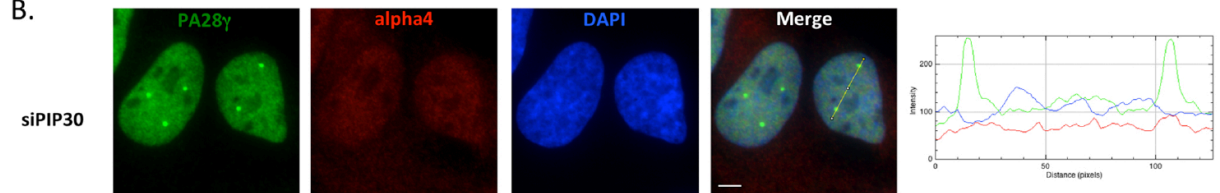

C.

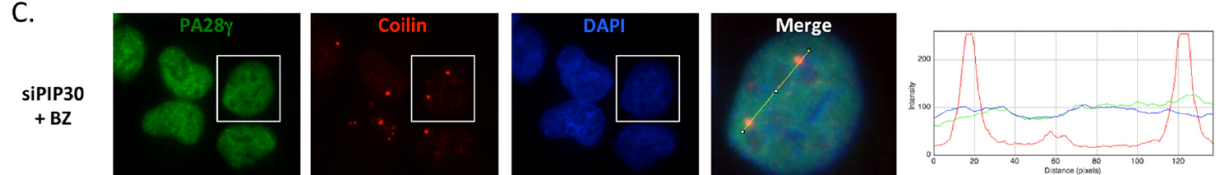

519

520

521 **Fig. 7: PIP30 depletion induces the accumulation of PA28γ, but not the 20S core**  
 522 **proteasome, in Cajal bodies**

523 A. *PIP30 depletion induces the accumulation of PA28γ in Cajal bodies.* The co-  
 524 localizations of endogenous PA28γ and coilin was analyzed by indirect  
 525 immunofluorescence in U2OS cells treated either with a control siRNA (siLuc), a  
 526 siRNA targeting PIP30 or siRNAs targeting both PIP30 and coilin, and in PIP30<sup>-/-</sup>  
 527 cells. The coilin signal is indicated in red, the PA28γ signal in green and the DAPI  
 528 signal in blue. **Right panels:** Profile plots, generated using ImageJ, display in two-  
 529 dimensional graphs the pixel intensities of the green, the red and the blue signals,  
 530 along the yellow lines drawn on the merge images. Bars, 10 μm.

- 531           B. ***The 20S proteasome does not accumulate in CBs together with PA28 $\gamma$ , after***  
532           ***PIP30 depletion.*** The co-localization between PA28 $\gamma$  and the  $\alpha$ 4-subunit of the 20S  
533           core proteasome (the latter used as a signature for the presence of the whole 20S  
534           core complex) was analyzed by immunofluorescence in cells depleted for PIP30 by  
535           siRNAs. The  $\alpha$ 4 signal is in red, the PA28 $\gamma$  signal in green and the DAPI signal in blue.  
536           A profile plot, similar to those of Fig. 7A, is shown (right panel). Bars, 10  $\mu$ m.
- 537           C. ***Proteasome inhibition prevents the accumulation of PA28 $\gamma$  in CBs.*** The co-  
538           localization between PA28 $\gamma$  and coilin was analyzed by indirect immunofluorescence  
539           in PIP30-depleted cells, treated with 10 nM bortezomib (BZ). The coilin signal is in  
540           red, the PA28 $\gamma$  signal in green and the DAPI signal in blue. A profile plot, similar to  
541           those of Fig. 7A, is shown (right panel). Bars, 10  $\mu$ m.
- 542

543 cells, suggesting that PA28 $\gamma$  function in CBs could be proteasome independent in these  
544 conditions.

545 Given that the PA28 $\gamma$ /coilin interaction is enhanced upon UV-C (Cioce et al., 2006), it  
546 was tempting to speculate that the accumulation of PA28 $\gamma$  in CBs in PIP30  $-/-$  cells is  
547 linked to an increased association between PA28 $\gamma$  and coilin. We checked this  
548 hypothesis, both by co-immunoprecipitation and PLA. Figure 8A shows a weak  
549 interaction between coilin and PA28 $\gamma$  in control cells, which is strongly enhanced (> 5  
550 fold) in PIP30  $-/-$  cells. In agreement with this result, we observed that the number of  
551 PLA dots per cell, which reports the interaction between PA28 $\gamma$  and coilin, was higher in  
552 PIP30  $-/-$  cells, as compared with control cells (101 versus 44) (Fig. 8B). We conclude  
553 that the absence of PIP30 favors the association between PA28 $\gamma$  and coilin. Interestingly,  
554 we could not detect any interaction between coilin and PIP30 by co-IP and by PLA (Fig.  
555 2A, S4A and S4B). This suggests that the association between PA28 $\gamma$  and either PIP30 or  
556 coilin is mutually exclusive and therefore strongly supports the idea that PIP30  
557 modulates PA28 $\gamma$  function in CB dynamics by competing with coilin for PA28 $\gamma$   
558 interaction.

559

## 560 DISCUSSION

561

562 In this study we report the identification of a novel and specific interaction partner of  
563 PA28 $\gamma$ , called FAM192A or NIP30 (NEFA Interacting Nuclear Protein 30 kDa) in  
564 databanks (UniProtKB - Q9GZU8), by a high throughput approach combining SILAC-  
565 based mass spectrometry and co-immunoprecipitation of endogenous PA28 $\gamma$ . The  
566 function of this protein is currently unknown and the origin of the NIP30 name itself is

Figure 8

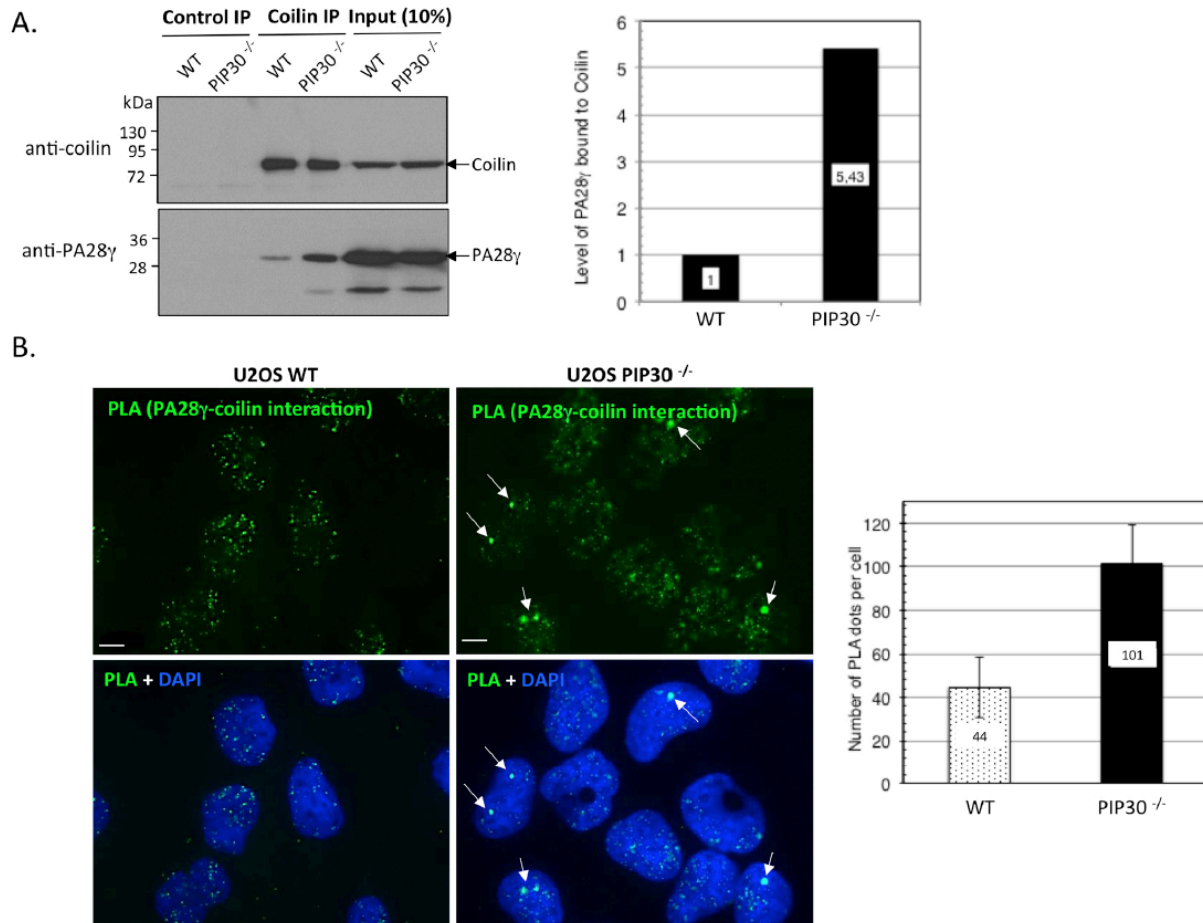

567

568

569 **Fig. 8: PIP30 depletion increases the interaction of PA28γ with coilin**

570 **A. PIP30 depletion increases the co-immunoprecipitation of PA28γ with endogenous**  
 571 **coilin.** Cell extracts from asynchronously growing parental (WT) or PIP30<sup>-/-</sup> U2OS cells  
 572 were incubated with control IgG or anti-coilin antibodies. Immunocomplexes were  
 573 analyzed by SDS-PAGE, probed for the indicated proteins (left panel), and the amount of  
 574 PA28γ associated with coilin was quantified and normalized to the amount of  
 575 immunoprecipitated coilin (right panel).

576 **B. PIP30 depletion leads to an increased interaction between PA28γ and coilin by PLA.**  
 577 To examine endogenous interactions between PA28γ and coilin, asynchronously growing  
 578 parental (WT) or PIP30<sup>-/-</sup> U2OS cells were subjected to an *in situ* proximity ligation assay  
 579 (PLA) using anti-PA28γ (mouse) and anti-coilin (rabbit) antibodies (left panel), and the  
 580 number of PLA dots was quantified using the ImageJ software (right panel). Data  
 581 represent the mean of two independent experiments (n= 123 WT cells and 112 PIP30<sup>-/-</sup>  
 582 cells). Bars, 10 μm.

583

584 not clear, although it has been postulated that the term “NEFA” could refer to “Non  
585 Esterified Fatty Acids”. Interestingly, our SILAC IPs reciprocally identified both PA28 $\gamma$   
586 and FAM192A as the most abundant interaction partner of the other. Several large-scale  
587 proteomic studies have also identified FAM192A together with PA28 $\gamma$  in the same  
588 complexes (Barth et al., 2014; Huttlin et al., 2015; Tsuruta et al., 2016; Wan et al., 2015).  
589 Therefore, we propose to rename FAM192A to “PA28 $\gamma$  Interacting Protein 30kDa”  
590 (PIP30), to highlight the physical and functional links between these two proteins.  
591 We show here that PA28 $\gamma$  interacts with the C-terminal domain of PIP30 and that CK2-  
592 dependent phosphorylation of a conserved acidic and serine-rich sequence located in  
593 this PIP30 C-terminal region plays a crucial role in the stabilization of the PIP30/PA28 $\gamma$   
594 complex. Of note, mutation of the putative phosphorylated serine residues (S222 and  
595 S228) reduced interaction with PA28 $\gamma$ , albeit not preventing binding completely. We  
596 hypothesize that multiple serine residues can be phosphorylated in this region, due to  
597 the multisite phosphorylation activity of CK2 (St-Denis et al., 2015). Consistent with this,  
598 the Global Proteome Machine (GPM) data repository indicates that serines S219, S221,  
599 S222 and S224 on PIP30 (Accession: ENSP00000335808) are phosphorylated *in vivo*  
600 (Craig et al., 2004). We propose therefore that the cluster of negative charges carried  
601 both by the acidic and the phosphorylated serine residues in the PIP30 C-terminus is  
602 critical for increasing the overall stability of the PIP30-PA28 $\gamma$  complex and could  
603 possibly constitute an anchorage site for positively charged residues in PA28 $\gamma$ .  
604 Given that CK2-dependent phosphorylation of PIP30 is important for its interaction with  
605 PA28 $\gamma$ , it is tempting to postulate that the regulation of CK2 activity may affect the  
606 formation of the PIP30/PA28 $\gamma$  complex. However, CK2 is a ubiquitous and pleiotropic  
607 kinase, involved in the phosphorylation of more than 20% of the whole proteome (Salvi



608 et al., 2009). Furthermore, CK2 inhibition during 24 h reduces but does not completely  
609 abolish PIP30 phosphorylation levels *in cellulo*. This result, together with the fact that  
610 PA28 $\gamma$ -bound PIP30 cannot be dephosphorylated by  $\lambda$ -phosphatase, suggests a slow  
611 turnover of the phosphate groups for the fraction of endogenous PIP30 complexed with  
612 PA28 $\gamma$  (more than 50%). For example, phosphorylated serines located at the interface  
613 between PIP30 and PA28 $\gamma$  may be inaccessible to phosphatases as long as the complex is  
614 stable. Altogether, these observations suggest that physiological destabilization of the  
615 PIP30/PA28 $\gamma$  interaction might involve structural changes in the PIP30/PA28 $\gamma$  complex  
616 that weaken the interface between the two proteins, thereby controlling the accessibility  
617 of PIP30 phosphorylation sites to phosphatases.

618 By investigating whether PIP30 could affect the function of PA28 $\gamma$  in the regulation of CB  
619 dynamics (Cioce et al., 2006), we observed that non-synchronized PIP30  $-/-$  and PA28 $\gamma$   $-$   
620  $-/-$  cells have opposite phenotypes regarding CB integrity, suggesting that PIP30 and  
621 PA28 $\gamma$  have antagonistic roles in this process. Interestingly, PIP30 depletion led to a  
622 strong decrease in the number of CBs and to an increased interaction between coilin and  
623 PA28 $\gamma$ , similarly to PA28 $\gamma$  overexpression and UV-C treatment (Cioce et al., 2006).  
624 However, a key feature of PIP30 depletion was the presence of residual CBs, in which  
625 PA28 $\gamma$  accumulated, whereas PA28 $\gamma$  overexpression and UV-C treatment induced an  
626 almost complete loss of CBs (Cioce et al., 2006). Of note, to our knowledge, PA28 $\gamma$  has  
627 only been observed to accumulate in CBs once before, in a study by Lafarga and  
628 colleagues in SMA motor neurons (Tapia et al., 2012). In these pathologic neurons, the  
629 assembly of CBs is impaired, due to the lack of SMN, an essential CB component  
630 (Lefebvre et al., 1995; Lemm et al., 2006; Liu and Dreyfuss, 1996). These neurons  
631 nevertheless possess residual CB structures that contain PA28 $\gamma$  (Tapia et al., 2012),

632 similarly to what we observed here in PIP30  $-/-$  cells. It has been shown that CBs are  
633 kinetic structures (Carmo-Fonseca et al., 1993) and therefore the phenotype observed in  
634 both PIP30  $-/-$  cells and SMA motor neurons, i.e., the accumulation of PA28 $\gamma$  in residual  
635 CBs, could reflect the fact that these residual CBs are stalled at intermediate stages of  
636 assembly/disassembly, in line with our hypothesis that PA28 $\gamma$  stimulates CB disruption  
637 and/or inhibits CB formation. Alternatively, the absence of PIP30 may result in the  
638 formation of defective CB structures that are not normally present in wild type cells.  
639 This raises an intriguing question: what are the mechanisms underlying PA28 $\gamma$ -  
640 mediated CB disruption in either PIP30  $-/-$ , or in PA28 $\gamma$ -overexpressing cells? One  
641 obvious possibility is that PA28 $\gamma$  could target CB components for degradation by the  
642 proteasome, since it is known that CBs are disrupted in cells lacking CB components,  
643 such as SMN, PHAX and WRAP53 (Lemm et al., 2006; Mahmoudi et al., 2010), and that  
644 the proteasome-dependent degradation of FLASH upon UV-C results in the  
645 disappearance of CB-associated Histone Locus bodies (Barcaroli et al., 2006; Bongiorno-  
646 Borbone et al., 2010). However, we could not detect 20S proteasome  $\alpha 4$  subunit  
647 accumulation in CBs, together with PA28 $\gamma$ , upon PIP30 depletion. In addition, we could  
648 not detect any interaction between 20S proteasome  $\alpha 6$  subunit and GFP-coilin, either in  
649 wild-type, or in PIP30  $-/-$  cells. Finally, proteasome inhibition, which stimulates the  
650 recruitment of PA28 $\gamma$  to the 20S proteasome, prevented the accumulation of PA28 $\gamma$  in  
651 CBs in PIP30  $-/-$  cells. Taken together, these findings suggest that the function of PA28 $\gamma$   
652 in CB dynamics could be proteasome-independent. Interestingly, the increase in CB  
653 number observed in bortezomib-treated cells by Lafarga and colleagues (Palanca et al.,  
654 2014) is in agreement with our data and could be explained by the fact that proteasome



655 inhibition favors the formation of PA28 $\gamma$ /20S proteasome complexes to the detriment of  
656 PA28 $\gamma$ /coilin complexes.

657 Importantly, CB disruption strongly correlates with an increase in the formation of the  
658 PA28 $\gamma$ /coilin complex in 1) UV-C-treated cells, 2) PIP30-depleted cells and 3) PA28 $\gamma$ -  
659 overexpressing cells. Therefore, another possibility to explain PA28 $\gamma$ -mediated CB  
660 disruption could be that the PA28 $\gamma$ /coilin complex interferes with coilin functioning as a  
661 CB scaffold protein, for example by inhibiting the association of coilin either with itself,  
662 or with other CB components, such as Sm proteins, SMN, etc., or both. In this context, our  
663 results suggest a model in which PIP30 competes with coilin for its interaction with  
664 PA28 $\gamma$ . When PIP30 is absent, the association between PA28 $\gamma$  and coilin is favored,  
665 leading to a decrease in the number of CBs. Similarly, GFP-PA28 $\gamma$  overexpression  
666 presumably increases the pool of free PA28 $\gamma$ , i.e., not bound to PIP30, and therefore  
667 leads to both an increased interaction of PA28 $\gamma$  with coilin, as seen in our GFP-PA28 $\gamma$   
668 SILAC pull-down, and consequent CB disruption (Cioce et al., 2006). In agreement with  
669 this hypothesis, we could not detect PIP30 and coilin in the same complex, either by  
670 GFP-PIP30 SILAC IP, or by GFP-coilin IP. We thus propose that the abundance of the  
671 PA28 $\gamma$ /coilin complex is a critical parameter for CB stability and that PIP30 could  
672 buffer/sequester PA28 $\gamma$  away from coilin, in a phosphorylation-dependent manner,  
673 thereby providing a reversible mechanism for regulating CB formation through the  
674 opposing action of kinases/phosphatases that modulate the interaction between PIP30  
675 and PA28 $\gamma$ . However, given that we observed an important overall stability of the  
676 PIP30/PA28 $\gamma$  complex, it is possible that the interaction between PIP30 and PA28 $\gamma$   
677 might be only locally regulated, possibly in the vicinity of CBs.

678 The role of PIP30 and PA28 $\gamma$  in CB dynamics might be especially important during the  
679 cellular stress response. In particular, PA28 $\gamma$  has been shown to participate in CB  
680 disruption upon UV-C treatment (Cioce et al., 2006). Therefore, an attractive hypothesis  
681 is that PIP30/PA28 $\gamma$  interaction could be down-regulated upon UV-C treatment.  
682 However, we could not detect a significant and reproducible change in the levels of  
683 PIP30/PA28 $\gamma$  association that could alone explain both the increased interaction of  
684 PA28 $\gamma$  with coilin and CB fragmentation in UV-C-treated cells. As discussed above, a  
685 possible explanation is that PIP30/PA28 $\gamma$  interaction is regulated locally and that the  
686 change in the overall population of PIP30/PA28 $\gamma$  complexes is too subtle to be detected.  
687 However, additional mechanisms, more complex than the simple dissociation of the  
688 PIP30/PA28 $\gamma$  complex, may also be at play during UV-C-induced CB disruption.  
689 Interestingly, like PA28 $\gamma$ , coilin is recruited to DNA damage sites upon genotoxic stress  
690 (Bártová et al., 2014; Suchánková et al., 2015). Given that the association between PA28 $\gamma$   
691 and coilin mostly occurs outside CBs and that this interaction is increased upon DNA  
692 damage, such as UV-C treatment, one can imagine that these two proteins might act in  
693 concert in the DNA damage response and exert a common function that is not limited to  
694 CB disruption. Therefore, it will be interesting to analyze the relationship between  
695 PA28 $\gamma$  and coilin under different types of stresses and investigate the function of PIP30  
696 in these processes.  
697 Altogether, our results in this study provide important insights into the function of the  
698 previously uncharacterized FAM192A/PIP30 protein and indicate that PIP30 plays an  
699 important role in regulating the proteasome activator PA28 $\gamma$ , linking it to the control of  
700 Cajal body dynamics, nuclear organization and participation in cellular stress responses.  
701

702 MATERIALS AND METHODS

703 *Antibodies and other reagents*

704 The sources of the antibodies used in this study were as follows: anti-PA28 $\gamma$  (rabbit  
705 polyclonal, BML-PW8190, ENZO Life Sciences; rabbit polyclonal, 383900, Zymed/Life  
706 Technologies; rabbit polyclonal, PD003, MBL; mouse monoclonal, 611180, BD  
707 Transduction), anti-GFP (rabbit polyclonal, TP401, Torrey Pines Biolabs), anti-coilin  
708 (mouse monoclonal 5P10 (Rebelo et al., 1996) for indirect immunofluorescence, rabbit  
709 polyclonal PLA 0290, Sigma-Aldrich, for PLA and IPs, rabbit polyclonal R288 (Andrade  
710 et al., 1993) for WB), anti- $\beta$ -actin (rabbit monoclonal, 13E5, Cell Signalling), anti- $\alpha$ -  
711 tubulin (mouse monoclonal, T9026, Sigma-Aldrich). The anti-FAM192A/PIP30 rabbit  
712 polyclonal antibody was raised against full-length protein (UniProtKB - Q9GZU8) and  
713 affinity-purified (home-made). Fluorescent secondary antibodies conjugated either to  
714 AlexaFluor 488, 594 and 633, or to DyLight 680 and 800, were purchased from  
715 Molecular Probes and ThermoFisher Scientific, respectively. Secondary antibodies  
716 conjugated to HRP were purchased from BioRad.

717 Recombinant Casein Kinase 2 was purchased from New England Biolabs (P6010S) and  
718 CK2 inhibitor CX-4945 from Selleckchem (S2248).

719

720 *Plasmids, subcloning and mutagenesis*

721 pEGFP-C1 FAM192A/PIP30 was generated by inserting FAM192A cDNA (GenBank  
722 NP\_079222.1, IMAGE 6305656) into pEGFP-C1 plasmid (Clontech), using HindIII and  
723 BamH1 restriction sites. FAM192A/PIP30 truncation and point mutation variants were  
724 then obtained either by PCR amplification or by site-directed mutagenesis.

725 For Cas9-mediated gene disruption, guide RNAs targeting PIP30  
726 (GCCTCTTACCATGTTTTCTGAGG) and PSME3/PA28 $\gamma$  (GGAAGTGAAGCTCAAGGTAGCGG)

727 were selected using ChopChop (<https://chopchop.rc.fas.harvard.edu/index.php>) and  
728 corresponding oligonucleotides were subcloned in pMLM3636 (gift from Keith Joung,  
729 Addgene, plasmid # 43860) and pUC57-U6 (gift from Edouard Bertrand's laboratory).  
730 For PIP30 depletion, 800 bp PIP30 right and left DNA homology arms were obtained by  
731 gene synthesis (IDT, USA) and subcloned in HR110PA-1 vector (SBI, Palo Alto, USA).

732

### 733 RNA interference

734 Silencing RNAs targeting PA28 $\gamma$  and FAM192A/PIP30 were obtained from Dharmacon  
735 (On target plus Human PSME3 siRNA 5 nmol (J-012133-05-0005) and SMARTpool On  
736 target plus Human FAM192A (L-014528-01), respectively). Silencing RNA targeting  
737 coilin was obtained from IDT (AGAGTCGAGAGAACAATA).

738

### 739 Cell culture and transfection

740 U2OS (HTB-96) and HeLa (CCL-2) cell lines were obtained from ATCC. Cells were grown  
741 in DMEM (4.5 g/L glucose) (Lonza) supplemented with 10% heat inactivated FBS  
742 (Sigma-Aldrich), 2 mM L-glutamine (Lonza), 10 U/ml penicillin and 10  $\mu$ g/ml  
743 streptomycin (Lonza) in humid atmosphere containing 5% CO<sub>2</sub> at 37°C. Media of cell  
744 lines with stable expression of GFP constructs were additionally supplied with G418  
745 (300  $\mu$ g/ml).

746 Cells were typically transfected with 20 nM siRNA and 0.5  $\mu$ g/ml DNA, using  
747 Lipofectamine RNAiMAX (Thermo Fisher Scientific) and Jet-PEI (Ozyme) transfection  
748 reagents respectively, according to manufacturer's instructions. Cells were treated and  
749 analyzed two days after siRNA transfection and one day after DNA transfection.

750 U2OS PIP30  $-/-$  cells were generated by co-transfection of PIP30 sgGuide, pJDS246-WT  
751 CAS9 (gift from Keith Joung, Addgene, plasmid # 43861) and PIP30 HR110PA-1 vector

752 using Turbofect (ThermoFischer) (Fu et al., 2014). PSME3/PA28 $\gamma$  -/- cells were  
753 generated by cotransfection of PSME3/PA28 $\gamma$  sgGuide and pX459 vectors. Both PIP30  
754 and PSME3/PA28 $\gamma$  -/- cells were selected with puromycin (1  $\mu$ g/ml). Single clones  
755 were then expanded and analyzed by western blotting using PIP30 and PA28 $\gamma$   
756 antibodies.

757 To generate stable GFP-PA28 $\gamma$  and GFP-FAM192A/PIP30 U2OS cell lines, parental U2OS  
758 cells were transfected with peGFP-C1 PA28 $\gamma$  and peGFP-C1 FAM192A/PIP30 plasmids  
759 and positive clones were selected in G418-containing medium.

760

#### 761 Production and purification of recombinant PIP30 and GST-PIP30

762 Recombinant PIP30 was produced in *E. coli* BL21 DE3 Codon Plus bacteria as a 6His-  
763 tagged protein and efficiently purified by affinity purification followed by proteolytic  
764 cleavage of the tag, ion exchange chromatography and gel filtration. Full-length protein  
765 was then used for rabbit immunization. GST-fusion proteins were produced in bacteria  
766 and efficiently purified using glutathione sepharose beads. In the kinase assay, purified  
767 GST-fusion proteins were buffer exchanged in PBS kinase buffer.

768

#### 769 Pull-down and immunoprecipitation

770 For immunoprecipitation of GFP-fusion proteins, U2OS cells were transfected with the  
771 indicated constructs. Twenty-four hours post-transfection, cells were homogenized in  
772 lysis buffer (25 mM HEPES pH 7.8, 100 mM KCl, 10 mM MgCl<sub>2</sub>, 1 mM EDTA, 1% IGEPAL  
773 CA-630, 0.1% Triton X-100, 1 mM DTT, 1 mM ATP, 10% glycerol (v/v)), in the presence  
774 of complete EDTA free protease inhibitor cocktail (Roche), for 15 min on ice. After  
775 centrifugation at 15000 g for 15 min (4°C), supernatants were recovered and protein  
776 concentration was determined by Bradford assays. 20  $\mu$ l of GFP-TRAP-A® beads

777 (Chromotek) were used per IP, mixed with 200  $\mu$ g of protein extract and incubated with  
778 constant gentle stirring for 1 h at 4°C. Beads were washed three times with lysis buffer  
779 and boiled in 2X Laemmli sample buffer. Samples were then analyzed by SDS-PAGE and  
780 immunoblotting.

781 Endogenous PIP30 and PA28 $\gamma$  were immunoprecipitated from 150  $\mu$ g (Fig. 5C) or 500  
782  $\mu$ g (Fig. 2D and S2B) of total cell extracts using anti-PIP30 (rabbit) and anti-PA28 $\gamma$   
783 (rabbit) antibodies, bound to protein A magnetic beads (Dynal, Lake Success, NY) for 2 h  
784 at 4°C.

785 For co-immunoprecipitation of coilin and PA28 $\gamma$  proteins (Fig. 8A), nuclear extracts  
786 were prepared as described in (Cioce et al., 2006). Briefly, U2OS and PIP30  $-/-$  cell  
787 pellets were resuspended in hypotonic buffer (10 mM Tris-HCl pH 7.5, 10% glycerol, 4  
788 mM DTT, 50 mM NaF, 1 mM Na<sub>3</sub>VO<sub>4</sub>, 1 mM MgCl<sub>2</sub>) in the presence of complete EDTA-  
789 free protease inhibitor cocktail (Roche). IGEPAL CA-630 was then added at the final  
790 concentration of 0.5% and cells were incubated on ice for 3 min. After centrifugation at  
791 800 g for 5 min, the nuclei, present in the pellet, were resuspended in digestion buffer (2  
792 mM Tris-HCl pH 8.5, 20% glycerol, 10 mM DTT, 50 mM NaF, 1 mM Na<sub>3</sub>VO<sub>4</sub>, 1 mM MgCl<sub>2</sub>,  
793 5 mM CaCl<sub>2</sub>, 1X complete protease inhibitor cocktail) supplemented with 75 U/ml  
794 micrococcal nuclease, and then digested for 15 min at 25°C with constant stirring. At the  
795 end, an equivalent volume of extraction buffer (2 mM Tris-HCl pH 8.5, 50 mM NaF, 1 mM  
796 Na<sub>3</sub>VO<sub>4</sub>, 1 mM MgCl<sub>2</sub>, 20 mM EDTA, 0.84 M KCl, 1X complete protease inhibitor cocktail)  
797 was added and the mix was incubated on ice for 20 min. Nuclear extracts were clarified  
798 by centrifugation for 30 min at 15000 g. Before immunoprecipitation, KCl concentration  
799 was reduced to 280 mM, 3  $\mu$ g of anti-coilin or control IgG were added to 400  $\mu$ g of  
800 nuclear extracts and incubated for 2 h at 4°C. Immunoprecipitated proteins were  
801 collected by addition of 15  $\mu$ l of protein A-sepharose beads. After extensive washes,

802 beads were boiled in 2X Laemmli sample buffer and samples were analyzed by SDS-  
803 PAGE and immunoblotting.

804 For GST pull-down, phosphorylated GST-PIP30 proteins were incubated with  
805 recombinant PA28 $\gamma$  in 50 mM Tris-HCl pH 7.5, 50 mM NaCl, 5 mM EDTA for 15 min then  
806 diluted in PBS and purified on glutathione sepharose beads. Beads were washed 3 times  
807 in PBS and proteins eluted by boiling in sample buffer.

808

### 809 Cell fixation, immunofluorescence microscopy and PLA assays

810 Cells were fixed in 3.7% paraformaldehyde/PBS for 10 min at room temperature (RT),  
811 washed with PBS and permeabilized in PBS containing 1% Triton X-100 for 15 min at  
812 RT. Coverslips were then blocked in blocking solution (1% FBS, 0.01% Tween-20/PBS)  
813 for 10-20 min and incubated with primary antibodies, diluted in blocking buffer, for 1 h  
814 at RT or 37°C in a humidified atmosphere. After three washes in PBS, coverslips were  
815 incubated with Alexa-Fluor conjugated secondary antibodies, diluted in blocking  
816 solution for 40 min at RT. Coverslips were washed with PBS, incubated with 0.1  $\mu$ g/ml  
817 DAPI solution in PBS for 5 min at RT, washed twice in PBS and finally once in H<sub>2</sub>O.  
818 Coverslips were mounted on glass slides using ProLong Gold antifade reagent (Thermo  
819 Fisher Scientific).

820 For proximity ligation assays (PLA), cells on coverslips were fixed in 3.7%  
821 paraformaldehyde/PBS for 20 min at RT, washed three times in PBS and permeabilized  
822 twice, first in PBS containing 0.25% Triton X-100 for 5 min at RT, washed three times in  
823 PBS and second in 100% cold methanol for 10 min at -20°C. After a step of rehydration  
824 by three washes in PBS (3 x 3 min at RT), coverslips were incubated in the blocking  
825 solution provided by the Duolink® kit. Cells were then incubated with anti-PA28 $\gamma$   
826 (mouse) and anti-PIP30 (rabbit) antibodies as described above. Duolink® *In Situ* PLA

827 Probe Anti-Rabbit MINUS and Anti-Mouse PLUS and Duolink® *In Situ* Detection  
828 Reagents (Sigma-Aldrich) were used, according to the manufacturer's instructions.

829

830 Image acquisition and analysis

831 Z-stacks and images were acquired with a 63 X/1.4 NA or 40 X/1.3 NA oil immersion  
832 objective lenses using widefield microscopes, DM6000 (Leica Microsystems) or  
833 Axioimager Z1 or Z2 (Carl Zeiss), equipped with coolSNAP HQ2 cameras (Photometrics).  
834 Images were acquired as TIF files using MetaMorph imaging software (Molecular  
835 Devices). Profile plots were generated in ImageJ software. For CB quantitative analysis,  
836 CBs were stained with mouse monoclonal anti-coilin primary antibody (5P10) and Goat  
837 anti-Rabbit IgG (H+L) secondary antibody, Alexa Fluor® 488. Z-stacks were acquired  
838 every 0.4 µm (Z step) with a range of 10 µm to image the whole nuclei. Specific band  
839 pass filters were used, BPem 340-380 and BPex 450-490 to detect DAPI and BPem 450-  
840 490 BPex 500-550 to detect AlexaFluor 488. The size, the intensity and the number of  
841 Cajal bodies were detected with ImageJ (1.49v). A specific "macro" has been created to  
842 automatically quantify these different parameters. The script allows to create a mask of  
843 DAPI image to isolate the nucleus of each cell and create a maximum intensity projection  
844 (MIP) of the 25 Z-stacks. The mask is used in the MIP to count the number of Cajal  
845 bodies of each nucleus via an appropriate thresholding. The "Analyze Particles" tool of  
846 ImageJ was used to calculate the size and the mean gray value of each Cajal body.  
847 The statistical analysis was done using the R software. For both graphs "% of CB positive  
848 cells" and "% of cells with 3 CBs and more", a chi-squared statistic test and a pairwise  
849 comparison of proportions were used. For both graphs "Mean area of CBs" and Mean  
850 intensity of CBs", a one-way ANOVA test and t-tests with non-pooled SD were used. P-  
851 values < 0,001 were indicated by 3 asterisks \*\*\*.



852

853

854 *In vitro CK2 phosphorylation assay*

855 GST and GST-PIP30-H201 proteins were incubated with recombinant CK2 according to  
856 the manufacturer's instructions. For radioactive kinase assays, <sup>33</sup>P labeled ATP (1  
857 μCi/100 μM) was included. Reactions were stopped either by adding 5 mM EDTA or  
858 Laemmli sample buffer.

859

860 *SILAC IPs and mass spectrometry analysis*

861

862 SILAC IPs (endogenous PA28γ, GFP-PA28γ and GFP-FAM192A/PIP30) were essentially  
863 performed as previously described in (Boulon et al., 2010). Briefly, parental U2OS and  
864 stable GFP-PA28γ and GFP-PIP30 U2OS cells were grown in DMEM medium for SILAC  
865 (ThermoFisher, 89985) supplemented with 10% dialyzed FCS and  
866 penicillin/streptomycin for 10 days. L-arginine (R0) (84 mg/ml, Sigma-Aldrich) and L-  
867 lysine (K0) (146 mg/ml, Sigma-Aldrich) were added to the light (L) medium, L-<sup>13</sup>C<sub>6</sub>-  
868 arginine (R6) and L-4,4,5,5-D<sub>4</sub>-lysine (K4) (Cambridge Isotope Laboratories) were  
869 added to the medium (M) medium and L-<sup>13</sup>C<sub>6</sub>,<sup>15</sup>N<sub>4</sub>-arginine (R10) and L-<sup>13</sup>C<sub>6</sub>,<sup>15</sup>N<sub>4</sub>-lysine  
870 (K8) (or L-<sup>13</sup>C<sub>6</sub>- arginine (R6) and L-<sup>13</sup>C<sub>6</sub>-lysine (K6)) (Cambridge Isotope Laboratories)  
871 were added to the heavy (H) medium. Ten 140-mm diameter culture dishes were used  
872 per SILAC condition. When indicated, cells were treated with MG132 proteasome  
873 inhibitor (25 μM) for 7 h. Whole cell extracts were prepared by lysing cells in 1X RIPA  
874 buffer (50 mM Tris-HCl pH 7.5, 150 mM NaCl, 1% IGEPAL CA-630, 0.5% DOC, protease  
875 inhibitor cocktail), sonicating 3 x 10 s on ice and centrifugating at 2800 g for 10 min at  
876 4°C to remove cell debris. For nuclear extracts, cells were incubated in buffer A (20 mM  
877 Tris-HCl pH 7.4, 10 mM KCl, 3 mM MgCl<sub>2</sub>, 0.1% IGEPAL CA-630, 10% glycerol, protease

878 inhibitor cocktail) for 10 min at 4°C, with occasional mixing. Nuclei were then  
879 centrifugated at 1430 g for 10 min at 4°C, resuspended in S1 solution (0.25 M sucrose,  
880 10 mM MgCl<sub>2</sub>, protease inhibitor cocktail) and layered over a cushion of S3 solution  
881 (0.88 M sucrose, 0.5 mM MgCl<sub>2</sub>, protease inhibitor cocktail). After centrifugation at 2800  
882 g for 10 min at 4°C, a cleaner nuclear pellet was obtained, which was resuspended in 1X  
883 RIPA buffer (50 mM Tris-HCl pH 7.5, 150 mM NaCl, 1% IGEPAL CA-630, 0.5% DOC,  
884 protease inhibitor cocktail), sonicated 5 x 10 s on ice, to ensure release of as many  
885 nuclear proteins as possible, and centrifuged at 2800 g for 10 min at 4°C to pellet debris.  
886 Prior to endogenous PA28 $\gamma$  IP, control rabbit IgG and anti-PA28 $\gamma$  antibodies (rabbit  
887 polyclonal ZYMED and MBL) were covalently coupled to protein G-dynabeads (Thermo  
888 Fisher Scientific). Nuclear extracts were precleared by incubation with protein G-  
889 dynabeads alone and separate IPs were then performed in parallel by incubating the  
890 same amount of proteins from L and M extracts on control and anti-PA28 $\gamma$ -beads,  
891 respectively. For GFP-PA28 $\gamma$  and GFP-PIP30 IPs, extracts were precleared with protein  
892 G-sepharose beads alone and separate IPs were then performed by incubating the same  
893 amount of proteins from L, M and H extracts with GFP-TRAP\_A affinity matrix  
894 (Chromotek) for 1 h at 4°C. After several washes, bound proteins were eluted in 1% SDS,  
895 boiled for 10 min, reduced and alkylated and then separated by SDS-PAGE. After tryptic  
896 *in gel* digestion, peptides were analyzed by LC-MS/MS (LTQ-Orbitrap XL, Thermo Fisher  
897 Scientific Inc.). Data were then analyzed and quantified by MaxQuant (version 1.0.12.31)  
898 (Cox et al., 2009) and the Mascot search engine (Matrix Science, version 2.2.2) software,  
899 as in (Boulon et al., 2010).

900

901 ACKNOWLEDGMENTS

902 We thank Drs Douglas Lamont and Kenneth Beattie of the Fingerprints Proteomics  
903 Facility at the University of Dundee for technical assistance with the MS analysis. We  
904 thank the Montpellier Ressources Imagerie (MRI) facility, member of the France-  
905 BioImaging infrastructure, for providing state of the art equipment and expertise in  
906 image analysis and software development. We address our special thanks to Cédric  
907 Hassen Khodja for the statistical analyses. We thank the CRBM animal house for the  
908 production of rabbit polyclonal antibodies. We are grateful to the past and current  
909 members of the Coux and Lamond laboratories for their advice and suggestions.  
910 The authors declare no competing financial interests.

911

#### 912 AUTHOR CONTRIBUTIONS

913 S.B. and O.C. conceived the project. SILAC IPs were performed by S.B and Douglas  
914 Lamont (Dundee Fingerprints Proteomics Facility). Recombinant PIP30 was purified by  
915 B.J.N. and O.C. Rabbit anti-PIP30 antibody was purified and characterized by B.J.N, F.M.  
916 and C.B.A. Endogenous PIP30 and PA28 $\gamma$  IPs were performed by C.B.A. PLA experiments  
917 were performed by V.B. B.J.N., D.F. and F.M. performed the molecular biology work. GST-  
918 and GFP-PIP30 pull-down experiments were performed by B.J.N and D.F.  
919 Phosphorylation studies and the production of the gene-edited cell lines were  
920 performed by D.F. and V.B. S.B. analyzed CB dynamics in PA28 $\gamma$   $-/-$  and PIP30  $-/-$  cells.  
921 V.B. and D.F. analyzed the localization of PA28 $\gamma$  in PIP30  $-/-$  cells. Coilin IPs were  
922 performed by V.B. The original draft was written by S.B. All authors discussed the results  
923 and commented on the manuscript.

924

#### 925 NON STANDARD ABBREVIATIONS

926 CB: Cajal body; CK2: Casein Kinase 2; H/L ratio : Heavy/Light ratio; IP :  
927 Immunoprecipitation; PIP30: PA28 $\gamma$  Interacting Protein 30kDa; PLA: Proximity  
928 Ligation Assay; SILAC: Stable Isotope Labeling by Amino-Acids in Cell Culture; U2OS :  
929 human OsteoSarcoma cell line.

930

931

932

### 933 REFERENCES

934

935 Andrade, L.E., Tan, E.M., Chan, E.K., 1993. Immunocytochemical analysis of the coiled  
936 body in the cell cycle and during cell proliferation. *Proc. Natl. Acad. Sci. U. S. A.* 90,  
937 1947–1951.

938 Baldin, V., Militello, M., Thomas, Y., Doucet, C., Fic, W., Boireau, S., Jariel-Encontre, I.,  
939 Piechaczyk, M., Bertrand, E., Tazi, J., Coux, O., 2008. A novel role for PA28 $\gamma$ -  
940 proteasome in nuclear speckle organization and SR protein trafficking. *Mol. Biol.*  
941 *Cell* 19, 1706–1716. doi:10.1091/mbc.E07-07-0637

942 Barcaroli, D., Dinsdale, D., Neale, M.H., Bongiorno-Borbone, L., Ranalli, M., Munarriz, E.,  
943 Sayan, A.E., McWilliam, J.M., Smith, T.M., Fava, E., Knight, R.A., Melino, G., De  
944 Laurenzi, V., 2006. FLASH is an essential component of Cajal bodies. *Proc. Natl.*  
945 *Acad. Sci. U. S. A.* 103, 14802–14807. doi:10.1073/pnas.0604225103

946 Barth, T.K., Schade, G.O.M., Schmidt, A., Vetter, I., Wirth, M., Heun, P., Thomae, A.W.,  
947 Imhof, A., 2014. Identification of novel *Drosophila* centromere-associated  
948 proteins. *Proteomics* 14, 2167–2178. doi:10.1002/pmic.201400052

949 Bártová, E., Foltánková, V., Legartová, S., Sehnalová, P., Sorokin, D.V., Suchánková, J.,  
950 Kozubek, S., 2014. Coilin is rapidly recruited to UVA-induced DNA lesions and  $\gamma$ -

- 951 radiation affects localized movement of Cajal bodies. *Nucl. Austin Tex* 5, 460–468.
- 952 doi:10.4161/nucl.29229
- 953 Bongiorno-Borbone, L., De Cola, A., Barcaroli, D., Knight, R.A., Di Ilio, C., Melino, G., De  
954 Laurenzi, V., 2010. FLASH degradation in response to UV-C results in histone  
955 locus bodies disruption and cell-cycle arrest. *Oncogene* 29, 802–810.
- 956 doi:10.1038/onc.2009.388
- 957 Boulon, S., Ahmad, Y., Trinkle-Mulcahy, L., Verheggen, C., Cobley, A., Gregor, P., Bertrand,  
958 E., Whitehorn, M., Lamond, A.I., 2010. Establishment of a protein frequency  
959 library and its application in the reliable identification of specific protein  
960 interaction partners. *Mol. Cell. Proteomics MCP* 9, 861–879.
- 961 doi:10.1074/mcp.M900517-MCP200
- 962 Carmo-Fonseca, M., Ferreira, J., Lamond, A.I., 1993. Assembly of snRNP-containing coiled  
963 bodies is regulated in interphase and mitosis--evidence that the coiled body is a  
964 kinetic nuclear structure. *J. Cell Biol.* 120, 841–852.
- 965 Cesaro, L., Pinna, L.A., 2015. The generation of phosphoserine stretches in  
966 phosphoproteins: mechanism and significance. *Mol. Biosyst.* 11, 2666–2679.
- 967 doi:10.1039/c5mb00337g
- 968 Chai, F., Liang, Y., Bi, J., Chen, L., Zhang, F., Cui, Y., Bian, X., Jiang, J., 2014. High expression  
969 of REG $\gamma$  is associated with metastasis and poor prognosis of patients with breast  
970 cancer. *Int. J. Clin. Exp. Pathol.* 7, 7834–7843.
- 971 Chen, D., Yang, X., Huang, L., Chi, P., 2013. The expression and clinical significance of  
972 PA28  $\gamma$  in colorectal cancer. *J. Investig. Med. Off. Publ. Am. Fed. Clin. Res.* 61,  
973 1192–1196. doi:10.2310/JIM.00000000000000001
- 974 Chen, X., Barton, L.F., Chi, Y., Clurman, B.E., Roberts, J.M., 2007. Ubiquitin-independent  
975 degradation of cell-cycle inhibitors by the REG $\gamma$  proteasome. *Mol. Cell* 26,

- 976 843–852. doi:10.1016/j.molcel.2007.05.022
- 977 Cioce, M., Boulon, S., Matera, A.G., Lamond, A.I., 2006. UV-induced fragmentation of Cajal  
978 bodies. *J. Cell Biol.* 175, 401–413. doi:10.1083/jcb.200604099
- 979 Cioce, M., Lamond, A.I., 2005. Cajal bodies: a long history of discovery. *Annu. Rev. Cell*  
980 *Dev. Biol.* 21, 105–131. doi:10.1146/annurev.cellbio.20.010403.103738
- 981 Cox, J., Matic, I., Hilger, M., Nagaraj, N., Selbach, M., Olsen, J.V., Mann, M., 2009. A practical  
982 guide to the MaxQuant computational platform for SILAC-based quantitative  
983 proteomics. *Nat. Protoc.* 4, 698–705. doi:10.1038/nprot.2009.36
- 984 Craig, R., Cortens, J.P., Beavis, R.C., 2004. Open source system for analyzing, validating,  
985 and storing protein identification data. *J. Proteome Res.* 3, 1234–1242.  
986 doi:10.1021/pr049882h
- 987 Dong, S., Jia, C., Zhang, S., Fan, G., Li, Y., Shan, P., Sun, L., Xiao, W., Li, L., Zheng, Y., Liu, J.,  
988 Wei, H., Hu, C., Zhang, W., Chin, Y.E., Zhai, Q., Li, Q., Liu, J., Jia, F., Mo, Q., Edwards,  
989 D.P., Huang, S., Chan, L., O'Malley, B.W., Li, X., Wang, C., 2013. The REGγ  
990 proteasome regulates hepatic lipid metabolism through inhibition of autophagy.  
991 *Cell Metab.* 18, 380–391. doi:10.1016/j.cmet.2013.08.012
- 992 Dundr, M., Ospina, J.K., Sung, M.-H., John, S., Upender, M., Ried, T., Hager, G.L., Matera,  
993 A.G., 2007. Actin-dependent intranuclear repositioning of an active gene locus in  
994 vivo. *J. Cell Biol.* 179, 1095–1103. doi:10.1083/jcb.200710058
- 995 Fu, Y., Reyon, D., Joung, J.K., 2014. Targeted genome editing in human cells using  
996 CRISPR/Cas nucleases and truncated guide RNAs. *Methods Enzymol.* 546, 21–45.  
997 doi:10.1016/B978-0-12-801185-0.00002-7
- 998 Gao, X., Li, J., Pratt, G., Wilk, S., Rechsteiner, M., 2004. Purification procedures determine  
999 the proteasome activation properties of REG gamma (PA28 gamma). *Arch.*  
1000 *Biochem. Biophys.* 425, 158–164. doi:10.1016/j.abb.2004.03.021

- 1001 Girard, C., Neel, H., Bertrand, E., Bordonné, R., 2006. Depletion of SMN by RNA  
1002 interference in HeLa cells induces defects in Cajal body formation. *Nucleic Acids*  
1003 *Res.* 34, 2925–2932. doi:10.1093/nar/gkl374
- 1004 He, J., Cui, L., Zeng, Y., Wang, G., Zhou, P., Yang, Y., Ji, L., Zhao, Y., Chen, J., Wang, Z., Shi, T.,  
1005 Zhang, P., Chen, R., Li, X., 2012. REGγ is associated with multiple oncogenic  
1006 pathways in human cancers. *BMC Cancer* 12, 75. doi:10.1186/1471-2407-12-75
- 1007 Hebert, M.D., 2013. Signals controlling Cajal body assembly and function. *Int. J. Biochem.*  
1008 *Cell Biol.* 45, 1314–1317. doi:10.1016/j.biocel.2013.03.019
- 1009 Huttlin, E.L., Ting, L., Bruckner, R.J., Gebreab, F., Gygi, M.P., Szpyt, J., Tam, S., Zarraga, G.,  
1010 Colby, G., Baltier, K., Dong, R., Guarani, V., Vaites, L.P., Ordureau, A., Rad, R.,  
1011 Erickson, B.K., Wühr, M., Chick, J., Zhai, B., Kolippakkam, D., Mintseris, J., Obar,  
1012 R.A., Harris, T., Artavanis-Tsakonas, S., Sowa, M.E., De Camilli, P., Paulo, J.A.,  
1013 Harper, J.W., Gygi, S.P., 2015. The BioPlex Network: A Systematic Exploration of  
1014 the Human Interactome. *Cell* 162, 425–440. doi:10.1016/j.cell.2015.06.043
- 1015 Kaiser, T.E., Intine, R.V., Dundr, M., 2008. De novo formation of a subnuclear body.  
1016 *Science* 322, 1713–1717. doi:10.1126/science.1165216
- 1017 Kish-Trier, E., Hill, C.P., 2013. Structural biology of the proteasome. *Annu. Rev. Biophys.*  
1018 42, 29–49. doi:10.1146/annurev-biophys-083012-130417
- 1019 Kobayashi, T., Wang, J., Al-Ahmadie, H., Abate-Shen, C., 2013. ARF regulates the stability  
1020 of p16 protein via REGγ-dependent proteasome degradation. *Mol. Cancer Res.*  
1021 *MCR* 11, 828–833. doi:10.1158/1541-7786.MCR-13-0207
- 1022 Lefebvre, S., Bürglen, L., Reboullet, S., Clermont, O., Burlet, P., Viollet, L., Benichou, B.,  
1023 Cruaud, C., Millasseau, P., Zeviani, M., 1995. Identification and characterization of  
1024 a spinal muscular atrophy-determining gene. *Cell* 80, 155–165.
- 1025 Lemm, I., Girard, C., Kuhn, A.N., Watkins, N.J., Schneider, M., Bordonné, R., Lührmann, R.,



- 1026 2006. Ongoing U snRNP biogenesis is required for the integrity of Cajal bodies.  
1027 Mol. Biol. Cell 17, 3221–3231. doi:10.1091/mbc.E06-03-0247
- 1028 Levy-Barda, A., Lerenthal, Y., Davis, A.J., Chung, Y.M., Essers, J., Shao, Z., van Vliet, N.,  
1029 Chen, D.J., Hu, M.C.-T., Kanaar, R., Ziv, Y., Shiloh, Y., 2011. Involvement of the  
1030 nuclear proteasome activator PA28 $\gamma$  in the cellular response to DNA double-  
1031 strand breaks. Cell Cycle Georget. Tex 10, 4300–4310.  
1032 doi:10.4161/cc.10.24.18642
- 1033 Li, J., Feng, X., Sun, C., Zeng, X., Xie, L., Xu, H., Li, T., Wang, R., Xu, X., Zhou, X., Zhou, M.,  
1034 Zhou, Y., Dan, H., Wang, Z., Ji, N., Deng, P., Liao, G., Geng, N., Wang, Y., Zhang, D.,  
1035 Lin, Y., Ye, L., Liang, X., Li, L., Luo, G., Jiang, L., Wang, Z., Chen, Q., 2015.  
1036 Associations between proteasomal activator PA28 $\gamma$  and outcome of oral  
1037 squamous cell carcinoma: Evidence from cohort studies and functional analyses.  
1038 EBioMedicine 2, 851–858. doi:10.1016/j.ebiom.2015.07.004
- 1039 Li, L., Dang, Y., Zhang, J., Yan, W., Zhai, W., Chen, H., Li, K., Tong, L., Gao, X., Amjad, A., Ji, L.,  
1040 Jing, T., Jiang, Z., Shi, K., Yao, L., Song, D., Liu, T., Yang, X., Yang, C., Cai, X., Xu, W.,  
1041 Huang, Q., He, J., Liu, J., Chen, T., Moses, R.E., Fu, J., Xiao, J., Li, X., 2015. REG $\gamma$  is  
1042 critical for skin carcinogenesis by modulating the Wnt/ $\beta$ -catenin pathway. Nat.  
1043 Commun. 6, 6875. doi:10.1038/ncomms7875
- 1044 Li, L., Zhao, D., Wei, H., Yao, L., Dang, Y., Amjad, A., Xu, J., Liu, J., Guo, L., Li, D., Li, Z., Zuo, D.,  
1045 Zhang, Y., Liu, J., Huang, S., Jia, C., Wang, L., Wang, Y., Xie, Y., Luo, J., Zhang, B., Luo,  
1046 H., Donehower, L.A., Moses, R.E., Xiao, J., O'Malley, B.W., Li, X., 2013. REG $\gamma$   
1047 deficiency promotes premature aging via the casein kinase 1 pathway. Proc. Natl.  
1048 Acad. Sci. U. S. A. 110, 11005–11010. doi:10.1073/pnas.1308497110
- 1049 Li, L.-P., Cheng, W.-B., Li, H., Li, W., Yang, H., Wen, D.-H., Tang, Y.-D., 2012. Expression of  
1050 proteasome activator REG $\gamma$  in human laryngeal carcinoma and associations with

- 1051 tumor suppressor proteins. *Asian Pac. J. Cancer Prev. APJCP* 13, 2699–2703.
- 1052 Li, S., Jiang, C., Pan, J., Wang, X., Jin, J., Zhao, L., Pan, W., Liao, G., Cai, X., Li, X., Xiao, J., Jiang,  
1053 J., Wang, P., 2015. Regulation of c-Myc protein stability by proteasome activator  
1054 REGγ. *Cell Death Differ.* 22, 1000–1011. doi:10.1038/cdd.2014.188
- 1055 Li, X., Amazit, L., Long, W., Lonard, D.M., Monaco, J.J., O'Malley, B.W., 2007. Ubiquitin- and  
1056 ATP-independent proteolytic turnover of p21 by the REGγ-proteasome  
1057 pathway. *Mol. Cell* 26, 831–842. doi:10.1016/j.molcel.2007.05.028
- 1058 Li, X., Lonard, D.M., Jung, S.Y., Malovannaya, A., Feng, Q., Qin, J., Tsai, S.Y., Tsai, M.-J.,  
1059 O'Malley, B.W., 2006. The SRC-3/AIB1 coactivator is degraded in a ubiquitin- and  
1060 ATP-independent manner by the REGγ proteasome. *Cell* 124, 381–392.  
1061 doi:10.1016/j.cell.2005.11.037
- 1062 Liu, Q., Dreyfuss, G., 1996. A novel nuclear structure containing the survival of motor  
1063 neurons protein. *EMBO J.* 15, 3555–3565.
- 1064 Machyna, M., Neugebauer, K.M., Staněk, D., 2015. Coilin: The first 25 years. *RNA Biol.* 12,  
1065 590–596. doi:10.1080/15476286.2015.1034923
- 1066 Mahmoudi, S., Henriksson, S., Weibrecht, I., Smith, S., Söderberg, O., Strömblad, S.,  
1067 Wiman, K.G., Farnebo, M., 2010. WRAP53 is essential for Cajal body formation  
1068 and for targeting the survival of motor neuron complex to Cajal bodies. *PLoS Biol.*  
1069 8, e1000521. doi:10.1371/journal.pbio.1000521
- 1070 Mao, I., Liu, J., Li, X., Luo, H., 2008. REGγ, a proteasome activator and beyond? *Cell.*  
1071 *Mol. Life Sci. CMLS* 65, 3971–3980. doi:10.1007/s00018-008-8291-z
- 1072 Matera, A.G., Wang, Z., 2014. A day in the life of the spliceosome. *Nat. Rev. Mol. Cell Biol.*  
1073 15, 108–121. doi:10.1038/nrm3742
- 1074 Meggio, F., Pinna, L.A., 2003. One-thousand-and-one substrates of protein kinase CK2?  
1075 *FASEB J. Off. Publ. Fed. Am. Soc. Exp. Biol.* 17, 349–368. doi:10.1096/fj.02-

- 1076 0473rev
- 1077 Moncsek, A., Gruner, M., Meyer, H., Lehmann, A., Kloetzel, P.-M., Stohwasser, R., 2015.
- 1078 Evidence for anti-apoptotic roles of proteasome activator 28 $\gamma$  via inhibiting
- 1079 caspase activity. *Apoptosis Int. J. Program. Cell Death* 20, 1211–1228.
- 1080 doi:10.1007/s10495-015-1149-6
- 1081 Moriishi, K., Mochizuki, R., Moriya, K., Miyamoto, H., Mori, Y., Abe, T., Murata, S., Tanaka,
- 1082 K., Miyamura, T., Suzuki, T., Koike, K., Matsuura, Y., 2007. Critical role of
- 1083 PA28 $\gamma$  in hepatitis C virus-associated steatogenesis and
- 1084 hepatocarcinogenesis. *Proc. Natl. Acad. Sci. U. S. A.* 104, 1661–1666.
- 1085 doi:10.1073/pnas.0607312104
- 1086 Moriishi, K., Okabayashi, T., Nakai, K., Moriya, K., Koike, K., Murata, S., Chiba, T., Tanaka,
- 1087 K., Suzuki, R., Suzuki, T., Miyamura, T., Matsuura, Y., 2003. Proteasome activator
- 1088 PA28 $\gamma$ -dependent nuclear retention and degradation of hepatitis C virus
- 1089 core protein. *J. Virol.* 77, 10237–10249.
- 1090 Morris, G.E., 2008. The Cajal body. *Biochim. Biophys. Acta* 1783, 2108–2115.
- 1091 doi:10.1016/j.bbamcr.2008.07.016
- 1092 Murata, S., Kawahara, H., Tohma, S., Yamamoto, K., Kasahara, M., Nabeshima, Y., Tanaka,
- 1093 K., Chiba, T., 1999. Growth retardation in mice lacking the proteasome activator
- 1094 PA28 $\gamma$ . *J. Biol. Chem.* 274, 38211–38215.
- 1095 Nie, J., Wu, M., Wang, J., Xing, G., He, F., Zhang, L., 2010. REG $\gamma$  proteasome mediates
- 1096 degradation of the ubiquitin ligase Smurf1. *FEBS Lett.* 584, 3021–3027.
- 1097 doi:10.1016/j.febslet.2010.05.034
- 1098 Nizami, Z., Deryusheva, S., Gall, J.G., 2010. The Cajal body and histone locus body. *Cold*
- 1099 *Spring Harb. Perspect. Biol.* 2, a000653. doi:10.1101/cshperspect.a000653
- 1100 Novotný, I., Blažíková, M., Staněk, D., Herman, P., Malinsky, J., 2011. In vivo kinetics of

- 1101 U4/U6·U5 tri-snRNP formation in Cajal bodies. *Mol. Biol. Cell* 22, 513–523.
- 1102 doi:10.1091/mbc.E10-07-0560
- 1103 Novotný, I., Malinová, A., Stejskalová, E., Matějů, D., Klimešová, K., Roithová, A., Švéda, M.,  
1104 Knejzlík, Z., Staněk, D., 2015. SART3-Dependent Accumulation of Incomplete  
1105 Spliceosomal snRNPs in Cajal Bodies. *Cell Rep.* doi:10.1016/j.celrep.2014.12.030
- 1106 Okamura, T., Taniguchi, S.-I., Ohkura, T., Yoshida, A., Shimizu, H., Sakai, M., Maeta, H.,  
1107 Fukui, H., Ueta, Y., Hisatome, I., Shigemasa, C., 2003. Abnormally high expression  
1108 of proteasome activator-gamma in thyroid neoplasm. *J. Clin. Endocrinol. Metab.*  
1109 88, 1374–1383. doi:10.1210/jc.2002-021413
- 1110 Palanca, A., Casafont, I., Berciano, M.T., Lafarga, M., 2014. Reactive nucleolar and Cajal  
1111 body responses to proteasome inhibition in sensory ganglion neurons. *Biochim.*  
1112 *Biophys. Acta* 1842, 848–859. doi:10.1016/j.bbadis.2013.11.016
- 1113 Pickering, A.M., Davies, K.J.A., 2012. Degradation of damaged proteins: the main function  
1114 of the 20S proteasome. *Prog. Mol. Biol. Transl. Sci.* 109, 227–248.  
1115 doi:10.1016/B978-0-12-397863-9.00006-7
- 1116 Pierre, F., Chua, P.C., O'Brien, S.E., Siddiqui-Jain, A., Bourbon, P., Haddach, M., Michaux, J.,  
1117 Nagasawa, J., Schwaebe, M.K., Stefan, E., Vialettes, A., Whitten, J.P., Chen, T.K.,  
1118 Darjania, L., Stansfield, R., Anderes, K., Bliesath, J., Drygin, D., Ho, C., Omori, M.,  
1119 Proffitt, C., Streiner, N., Trent, K., Rice, W.G., Ryckman, D.M., 2011. Discovery and  
1120 SAR of 5-(3-chlorophenylamino)benzo[c][2,6]naphthyridine-8-carboxylic acid  
1121 (CX-4945), the first clinical stage inhibitor of protein kinase CK2 for the  
1122 treatment of cancer. *J. Med. Chem.* 54, 635–654. doi:10.1021/jm101251q
- 1123 Poh, Y.-C., Shevtsov, S.P., Chowdhury, F., Wu, D.C., Na, S., Dunder, M., Wang, N., 2012.  
1124 Dynamic force-induced direct dissociation of protein complexes in a nuclear body  
1125 in living cells. *Nat. Commun.* 3, 866. doi:10.1038/ncomms1873

- 1126 Rebelo, L., Almeida, F., Ramos, C., Bohmann, K., Lamond, A.I., Carmo-Fonseca, M., 1996.  
1127 The dynamics of coiled bodies in the nucleus of adenovirus-infected cells. *Mol.*  
1128 *Biol. Cell* 7, 1137–1151.
- 1129 Roessler, M., Rollinger, W., Mantovani-Endl, L., Hagmann, M.-L., Palme, S., Berndt, P.,  
1130 Engel, A.M., Pfeffer, M., Karl, J., Bodenmüller, H., Rüschoff, J., Henkel, T., Rohr, G.,  
1131 Rossol, S., Rösch, W., Langen, H., Zolg, W., Tacke, M., 2006. Identification of PSME3  
1132 as a novel serum tumor marker for colorectal cancer by combining two-  
1133 dimensional polyacrylamide gel electrophoresis with a strictly mass  
1134 spectrometry-based approach for data analysis. *Mol. Cell. Proteomics MCP* 5,  
1135 2092–2101. doi:10.1074/mcp.M600118-MCP200
- 1136 Salvi, M., Sarno, S., Cesaro, L., Nakamura, H., Pinna, L.A., 2009. Extraordinary pleiotropy  
1137 of protein kinase CK2 revealed by weblogo phosphoproteome analysis. *Biochim.*  
1138 *Biophys. Acta* 1793, 847–859. doi:10.1016/j.bbamcr.2009.01.013
- 1139 Shibatani, T., Carlson, E.J., Larabee, F., McCormack, A.L., Früh, K., Skach, W.R., 2006.  
1140 Global organization and function of mammalian cytosolic proteasome pools:  
1141 Implications for PA28 and 19S regulatory complexes. *Mol. Biol. Cell* 17, 4962–  
1142 4971. doi:10.1091/mbc.E06-04-0311
- 1143 St-Denis, N., Gabriel, M., Turowec, J.P., Gloor, G.B., Li, S.S.-C., Gingras, A.-C., Litchfield,  
1144 D.W., 2015. Systematic investigation of hierarchical phosphorylation by protein  
1145 kinase CK2. *J. Proteomics* 118, 49–62. doi:10.1016/j.jprot.2014.10.020
- 1146 Strzelecka, M., Trowitzsch, S., Weber, G., Lührmann, R., Oates, A.C., Neugebauer, K.M.,  
1147 2010. Coilin-dependent snRNP assembly is essential for zebrafish  
1148 embryogenesis. *Nat. Struct. Mol. Biol.* 17, 403–409. doi:10.1038/nsmb.1783
- 1149 Suchánková, J., Kozubek, S., Legartová, S., Sehnalová, P., Küntziger, T., Bártová, E., 2015.  
1150 Distinct kinetics of DNA repair protein accumulation at DNA lesions and cell

- 1151 cycle-dependent formation of  $\gamma$ H2AX- and NBS1-positive repair foci. *Biol. Cell*  
1152 107, 440–454. doi:10.1111/boc.201500050
- 1153 Sun, L., Fan, G., Shan, P., Qiu, X., Dong, S., Liao, L., Yu, C., Wang, T., Gu, X., Li, Q., Song, X.,  
1154 Cao, L., Li, X., Cui, Y., Zhang, S., Wang, C., 2016. Regulation of energy homeostasis  
1155 by the ubiquitin-independent REG $\gamma$  proteasome. *Nat. Commun.* 7, 12497.  
1156 doi:10.1038/ncomms12497
- 1157 Tapia, O., Bengoechea, R., Palanca, A., Arteaga, R., Val-Bernal, J.F., Tizzano, E.F., Berciano,  
1158 M.T., Lafarga, M., 2012. Reorganization of Cajal bodies and nucleolar targeting of  
1159 coilin in motor neurons of type I spinal muscular atrophy. *Histochem. Cell Biol.*  
1160 137, 657–667. doi:10.1007/s00418-012-0921-8
- 1161 Tomko, R.J., Hochstrasser, M., 2013. Molecular architecture and assembly of the  
1162 eukaryotic proteasome. *Annu. Rev. Biochem.* 82, 415–445. doi:10.1146/annurev-  
1163 biochem-060410-150257
- 1164 Trinkle-Mulcahy, L., Sleeman, J.E., 2016. The Cajal body and the nucleolus: “In a  
1165 relationship” or “It’s complicated”? *RNA Biol.* 1–13.  
1166 doi:10.1080/15476286.2016.1236169
- 1167 Tsuruta, F., Takebe, A., Haratake, K., Kanemori, Y., Kim, J., Endo, T., Kigoshi, Y., Fukuda, T.,  
1168 Miyahara, H., Ebina, M., Baba, T., Chiba, T., 2016. SCFFbl12 Increases  
1169 p21Waf1/Cip1 Expression Level through Atypical Ubiquitin Chain Synthesis. *Mol.*  
1170 *Cell. Biol.* 36, 2182–2194. doi:10.1128/MCB.00174-16
- 1171 Waddell, D.S., Duffin, P.J., Haddock, A.N., Triplett, V.E., Saredy, J.J., Kakareka, K.M.,  
1172 Eldredge, J.T., 2016. Isolation, expression analysis and characterization of NEFA-  
1173 interacting nuclear protein 30 and RING finger and SPRY domain containing 1 in  
1174 skeletal muscle. *Gene* 576, 319–332. doi:10.1016/j.gene.2015.10.046
- 1175 Wan, C., Borgeson, B., Phanse, S., Tu, F., Drew, K., Clark, G., Xiong, X., Kagan, O., Kwan, J.,

- 1176 Bezginov, A., Chessman, K., Pal, S., Cromar, G., Papoulas, O., Ni, Z., Boutz, D.R.,  
1177 Stoilova, S., Havugimana, P.C., Guo, X., Maly, R.H., Sarov, M., Greenblatt, J., Babu,  
1178 M., Derry, W.B., Tillier, E.R., Wallingford, J.B., Parkinson, J., Marcotte, E.M., Emili,  
1179 A., 2015. Panorama of ancient metazoan macromolecular complexes. *Nature* 525,  
1180 339–344. doi:10.1038/nature14877
- 1181 Wang, Q., Sawyer, I.A., Sung, M.-H., Sturgill, D., Shevtsov, S.P., Pegoraro, G., Hakim, O.,  
1182 Baek, S., Hager, G.L., Dundr, M., 2016. Cajal bodies are linked to genome  
1183 conformation. *Nat. Commun.* 7, 10966. doi:10.1038/ncomms10966
- 1184 Welk, V., Coux, O., Kleene, V., Abeza, C., Trümbach, D., Eickelberg, O., Meiners, S., 2016.  
1185 Inhibition of Proteasome Activity Induces Formation of Alternative Proteasome  
1186 Complexes. *J. Biol. Chem.* 291, 13147–13159. doi:10.1074/jbc.M116.717652
- 1187 Xiong, S., Zheng, Y., Jiang, P., Liu, R., Liu, X., Qian, J., Gu, J., Chang, L., Ge, D., Chu, Y., 2014.  
1188 PA28gamma emerges as a novel functional target of tumour suppressor  
1189 microRNA-7 in non-small-cell lung cancer. *Br. J. Cancer* 110, 353–362.  
1190 doi:10.1038/bjc.2013.728
- 1191 Ying, H., Furuya, F., Zhao, L., Araki, O., West, B.L., Hanover, J.A., Willingham, M.C., Cheng,  
1192 S.-Y., 2006. Aberrant accumulation of PTTG1 induced by a mutated thyroid  
1193 hormone beta receptor inhibits mitotic progression. *J. Clin. Invest.* 116, 2972–  
1194 2984. doi:10.1172/JCI28598
- 1195 Zannini, L., Buscemi, G., Fontanella, E., Lisanti, S., Delia, D., 2009.  
1196 REGgamma/PA28gamma proteasome activator interacts with PML and Chk2 and  
1197 affects PML nuclear bodies number. *Cell Cycle Georget. Tex* 8, 2399–2407.  
1198 doi:10.4161/cc.8.15.9084
- 1199 Zannini, L., Lecis, D., Buscemi, G., Carlessi, L., Gasparini, P., Fontanella, E., Lisanti, S.,  
1200 Barton, L., Delia, D., 2008. REGgamma proteasome activator is involved in the



1201 maintenance of chromosomal stability. *Cell Cycle Georget. Tex* 7, 504–512.

1202 Zhang, Y., Liu, S., Zuo, Q., Wu, L., Ji, L., Zhai, W., Xiao, J., Chen, J., Li, X., 2015. Oxidative

1203 challenge enhances REGγ-proteasome-dependent protein degradation. *Free*

1204 *Radic. Biol. Med.* 82, 42–49. doi:10.1016/j.freeradbiomed.2015.01.024

1205

1206

1207

**Table S1**

| Gene Names     | Protein IDs   | Protein Names                                                           | Unique Peptides | Sequence Coverage [%] | Ratio H/L | Intensity H |
|----------------|---------------|-------------------------------------------------------------------------|-----------------|-----------------------|-----------|-------------|
| PSMA1          | P25786        | Proteasome subunit alpha type-1                                         | 14              | 52,4                  | 39,747    | 7888600     |
| PSME3          | P61289        | Proteasome activator complex subunit 3                                  | 25              | 76,8                  | 14,914    | 2009700000  |
| CEP152         | O94986        | Centrosomal protein of 152 kDa                                          | 3               | 2,5                   | 12,05     | 3400400     |
| SMARCA4        | P51532        | SMARCA4 isoform 2 [SWI/SNF related, matrix associated, actin dependent] | 16              | 20,1                  | 6,2142    | 469900      |
| BRD9           | Q9H8M2        | Bromodomain-containing protein 9                                        | 8               | 17,8                  | 4,394     | 338740      |
| NDUFS8         | O00217        | NADH dehydrogenase [ubiquinone] iron-sulfur protein 8, mitochondrial    | 7               | 36,2                  | 3,982     | 33060000    |
| MATR3          | P43243        | Matrin-3                                                                | 2               | 5,1                   | 3,7907    | 176150      |
| FAM192A        | Q9GZU8        | NEFA-interacting nuclear protein NIP30                                  | 14              | 48                    | 3,258     | 3433900     |
| FAU            | P62861        | Ubiquitin-like protein FUB1;40S ribosomal protein S30                   | 3               | 14,3                  | 2,9776    | 86965       |
| HNRNP1;HNRPL   | P14866        | Heterogeneous nuclear ribonucleoprotein L                               | 4               | 7,1                   | 2,675     | 775540      |
| PLEC1          | Q15149        | Plectin-1;Hemidesmosomal protein 1;Plectin-11                           | 3               | 68,4                  | 2,5439    | 105370000   |
| U2AF2;U2AF65   | P26368        | Splicing factor U2AF 65 kDa subunit                                     | 16              | 35,2                  | 2,4359    | 5525600     |
| U2AF1;U2AF35   | Q01081        | Splicing factor U2AF 35 kDa subunit                                     | 8               | 35                    | 2,3661    | 5108200     |
| HNRNPM;HNRPM   | P52272        | Heterogeneous nuclear ribonucleoprotein M                               | 6               | 9,7                   | 2,3499    | 2570200     |
| SF3B3          | Q15393        | Splicing factor 3B subunit 3                                            | 8               | 8,3                   | 2,3467    | 2011200     |
| HNRNPF;HNRPF   | P52597        | Heterogeneous nuclear ribonucleoprotein F                               | 2               | 13,5                  | 2,3449    | 5383200     |
| SF3B14         | Q9Y3B4        | Pre-mRNA branch site protein p14;SF3B 14 kDa subunit                    | 5               | 47,2                  | 2,1821    | 183820      |
| BCLAF1         | Q9NVF8        | Bcl-2-associated transcription factor 1                                 | 6               | 6,1                   | 2,1019    | 4912900     |
| RPS26          | P62854        | 40S ribosomal protein S26                                               | 4               | 37,4                  | 2,0653    | 591760      |
| RPL22          | P35268        | 60S ribosomal protein L22                                               | 5               | 55,5                  | 1,995     | 588410      |
| SF3B1;SAP155   | O75533        | Splicing factor 3B subunit 1                                            | 20              | 19,1                  | 1,992     | 11332000    |
| RP9            | Q8TA86        | Retinitis pigmentosa 9 protein                                          | 14              | 49,3                  | 1,9651    | 16962000    |
| RBM39          | Q14498        | RNA-binding protein 39                                                  | 22              | 52,1                  | 1,9309    | 46370000    |
| ERH            | P84090        | Enhancer of rudimentary homolog                                         | 6               | 51                    | 1,7589    | 5241600     |
| DHX9;DDX9      | Q08211        | ATP-dependent RNA helicase A;DEAH box protein 9                         | 2               | 2,2                   | 1,758     | 191250      |
| SFRS12IP1      | Q8N9Q2        | Protein SFRS12IP1;p18SRP                                                | 4               | 21,4                  | 1,726     | 1334100     |
| MMTAG2         | Q9BU76        | Multiple myeloma tumor-associated protein 2                             | 6               | 22,8                  | 1,7134    | 597760      |
| RPS27          | P42677        | 40S ribosomal protein S27                                               | 2               | 39,3                  | 1,7133    | 368970      |
| ZCCHC17        | Q9NP64        | Nucleolar protein of 40 kDa                                             | 4               | 21                    | 1,7021    | 587080      |
| DHX15          | O43143        | DEAH box protein 15                                                     | 4               | 5,8                   | 1,6943    | 725370      |
| SNRPD2;SNRPD1  | P62316;A8K797 | Small nuclear ribonucleoprotein Sm D2                                   | 7               | 55,1                  | 1,5949    | 312580      |
| DYNLL1         | P63167        | Dynein light chain 1, cytoplasmic                                       | 2               | 20,2                  | 1,589     | 320610      |
| DDX5           | P17844        | Probable ATP-dependent RNA helicase DDX5                                | 13              | 30                    | 1,5841    | 20552000    |
| THRAP3;TRAP150 | Q9Y2W1        | Thyroid hormone receptor-associated protein 3                           | 13              | 14,9                  | 1,5195    | 13683000    |
| PRPF40A        | O75400        | Pre-mRNA-processing factor 40 homolog A                                 | 5               | 25                    | 1,4285    | 265810      |

1272

1273

1274 **Table S1: List of the PA28 $\gamma$  interaction partners identified in endogenous PA28 $\gamma$  SILAC IP**  
 1275 **(untreated cells).** Only proteins identified with a significant H/L SILAC ratio (H/L ratio > 1.4)  
 1276 and containing at least two unique peptides identified are listed in this table. Proteins are  
 1277 classified by descending order for the H/L ratio.

1278

1279

1280

**Table S2**

| Gene Names     | Protein IDs | Protein Names                                                           | Unique Peptides | Sequence Coverage [%] | Ratio H/L | Intensity H |
|----------------|-------------|-------------------------------------------------------------------------|-----------------|-----------------------|-----------|-------------|
| PSMB6          | P28072      | Proteasome subunit beta type-6                                          | 5               | 19,7                  | 61,825    | 9767900     |
| PSMB5          | P28074      | Proteasome subunit beta type-5                                          | 9               | 36,9                  | 52,022    | 22181000    |
| EEF1G;EF1G     | P26641      | Elongation factor 1-gamma                                               | 2               | 4,5                   | 29,713    | 851540      |
| PSMA5          | P28066      | Proteasome subunit alpha type-5                                         | 11              | 60,6                  | 26,761    | 32061000    |
| PSMB3          | P49720      | Proteasome subunit beta type-3                                          | 8               | 45,9                  | 26,549    | 28571000    |
| PSMA3          | P25788      | Proteasome subunit alpha type-3                                         | 13              | 40,8                  | 24,739    | 37334000    |
| PLEC1          | Q15149      | Plectin-1                                                               | 3               | 68,4                  | 19,738    | 2023100000  |
| PSMB2          | P49721      | Proteasome subunit beta type-2                                          | 11              | 64,7                  | 15,326    | 20648000    |
| NDUFS8         | O00217      | NADH dehydrogenase [ubiquinone] iron-sulfur protein 8, mitochondrial    | 6               | 36,2                  | 15,058    | 6896600     |
| TTN            | Q8WZ42      | Titin                                                                   | 2               | 0,1                   | 14,016    | 191830      |
| PSMD12         | O00232      | 26S proteasome non-ATPase regulatory subunit 12                         | 6               | 13,2                  | 12,646    | 1334300     |
| AP2S1;AP17     | P53680      | AP-2 complex subunit sigma-1coat assembly protein AP17                  | 2               | 13,4                  | 10,682    | 442660      |
| PSME3          | P61289      | Proteasome activator complex subunit 3                                  | 21              | 76,8                  | 10,552    | 670710000   |
| PSMA2          | P25787      | Proteasome subunit alpha type-2                                         | 8               | 51,7                  | 9,8303    | 22739000    |
| VIM            | P08670      | Vimentin                                                                | 35              | 83,7                  | 9,6953    | 315740000   |
| PSMA4          | P25789      | Proteasome subunit alpha type-4                                         | 10              | 47,5                  | 9,6604    | 31401000    |
| PSMA1          | P25786      | Proteasome subunit alpha type-1type                                     | 14              | 52,4                  | 9,5647    | 22654000    |
| PSMD7          | P51665      | 26S proteasome non-ATPase regulatory subunit 7                          | 7               | 30,2                  | 9,3949    | 3070300     |
| SMARCA4        | P51532      | SMARCA4 isoform 2 (SWI/SNF related, matrix associated, actin dependent) | 16              | 20,1                  | 8,6871    | 31323000    |
| BRE            | Q9NXR7      | Protein BRE                                                             | 2               | 5,8                   | 8,5646    | 326400      |
| PSMB1          | P20618      | Proteasome subunit beta type-1                                          | 12              | 57,3                  | 8,5341    | 41981000    |
| KRT18          | P05783      | Keratin, type I cytoskeletal 18                                         | 16              | 66,7                  | 8,4512    | 45191000    |
| PSMD2          | Q13200      | 26S proteasome non-ATPase regulatory subunit 22                         | 14              | 22,5                  | 8,1266    | 9468800     |
| PSMB7          | Q99436      | Proteasome subunit beta type-7                                          | 9               | 43,3                  | 8,0026    | 10857000    |
| FAM192A; NIP30 | Q9GZU8      | NEFA-interacting nuclear protein NIP30                                  | 14              | 48                    | 7,9182    | 17204000    |
| RPS27A         | P62979      | 40S ribosomal protein S27a;Ubiquitin                                    | 2               | 59,6                  | 7,7174    | 153390000   |
| HSPB1          | P04792      | Heat shock protein beta-1                                               | 9               | 59,5                  | 7,716     | 9644100     |
| CAV1           | Q03135      | Caveolin-1                                                              | 6               | 41                    | 7,2766    | 5718100     |
| PSMD14         | O00487      | 26S proteasome non-ATPase regulatory subunit 14                         | 3               | 9,7                   | 6,5297    | 1434000     |
| PSMA6          | P60900      | Proteasome subunit alpha type-6                                         | 13              | 56,1                  | 6,1175    | 47883000    |
| PSMC5          | P62195      | 26S protease regulatory subunit 8                                       | 13              | 41,1                  | 6,1121    | 4765000     |
| PSMD11         | O00231      | 26S proteasome non-ATPase regulatory subunit 11                         | 16              | 41,6                  | 6,0466    | 4502500     |
| PSMB4          | P28070      | Proteasome subunit beta type-4                                          | 8               | 47                    | 5,9875    | 13090000    |
| MYL6           | P60660      | Myosin light polypeptide 6                                              | 10              | 66,2                  | 5,8686    | 6197400     |
| MYH9           | P35579      | Myosin-9                                                                | 74              | 69,5                  | 5,7347    | 69254000    |
| KRT8           | P05787      | Keratin, type II cytoskeletal 8                                         | 22              | 57,6                  | 5,2887    | 28652000    |
| RUVBL2         | Q9Y230      | RuvB-like 2                                                             | 2               | 3,9                   | 5,2244    | 125970      |
| BAG2           | O95816      | BAG family molecular chaperone regulator 2                              | 4               | 18                    | 5,2078    | 754860      |
| HSPA1A         | P0DMV8      | Heat shock 70 kDa protein 1                                             | 2               | 50,9                  | 5,2065    | 38135000    |
| PSMD8          | P48556      | 26S proteasome non-ATPase regulatory subunit 8                          | 3               | 9,1                   | 5,0877    | 412950      |
| KRT75          | O95678      | Keratin, type II cytoskeletal 75                                        | 3               | 22                    | 4,8303    | 870110      |
| PSMA7          | O14818      | Proteasome subunit alpha type-7                                         | 13              | 63,3                  | 4,6955    | 66492000    |
| PSMC6          | P62333      | 26S protease regulatory subunit 10b                                     | 10              | 25,1                  | 4,6081    | 4927600     |
| PSMC2          | P35998      | 26S protease regulatory subunit 7                                       | 9               | 22,2                  | 4,399     | 1275300     |
| KRT80          | Q6KB66      | Keratin, type II cytoskeletal 80                                        | 5               | 15,9                  | 4,3462    | 172030      |
| PSMD1          | Q99460      | 26S proteasome non-ATPase regulatory subunit 1                          | 16              | 23,5                  | 4,299     | 4071000     |
| KRT81          | Q14533      | Keratin type II cuticular Hb1                                           | 5               | 17                    | 3,9881    | 1496600     |
| MYO1C          | O00159      | MYO1C variant protein                                                   | 18              | 22,4                  | 3,9351    | 4249400     |
| DHRS2          | Q13268      | Dehydrogenase/reductase SDR family member 2                             | 14              | 52,5                  | 3,8848    | 59972000    |
| PLEC1          | Q15149      | Plectin-1                                                               | 3               | 66,6                  | 3,8655    | 720170      |
| EIF2S1;EIF2A   | P05198      | Eukaryotic translation initiation factor 2 subunit 1                    | 2               | 6,7                   | 3,6806    | 159500      |
| FLNC           | Q14315      | Filamin-C                                                               | 70              | 36,7                  | 3,6623    | 27721000    |
| DBN1           | Q16643      | Drebrin                                                                 | 3               | 31,7                  | 3,6587    | 594780      |
| PSMC3          | P17980      | 26S protease regulatory subunit 6A                                      | 6               | 17,8                  | 3,5678    | 2305000     |
| TUBA1B         | P68363      | Tubulin alpha-1B chain                                                  | 9               | 34,8                  | 3,5627    | 6845900     |
| TUBG1          | P23258      | Tubulin gamma-1 chain                                                   | 2               | 5,3                   | 3,4215    | 52089       |
| MYLC2B;MRLC2   | O14950      | Myosin regulatory light chain MRCL3 variant                             | 7               | 60,5                  | 3,3971    | 2176600     |
| PSMB8          | P28062      | Proteasome subunit beta type-8                                          | 7               | 25                    | 3,3699    | 1727800     |
| HSPA8          | P11142      | Heat shock cognate 71 kDa protein                                       | 18              | 40,7                  | 3,3545    | 16824000    |
| PATZ1          | Q9HBE1      | POZ-, AT hook-, and zinc finger-containing protein 1                    | 3               | 5,2                   | 3,3295    | 370370      |
| HSPA6          | P17066      | Heat shock 70 kDa protein 6                                             | 2               | 17                    | 3,3082    | 287710      |
| PSMC1          | P62191      | 26S protease regulatory subunit 4                                       | 10              | 30,7                  | 3,2831    | 6846300     |
| TRIM3          | O75382      | Tripartite motif-containing protein 3                                   | 8               | 14,4                  | 3,1483    | 1357700     |
| PSMC4          | P43686      | 26S protease regulatory subunit 6b                                      | 14              | 42,3                  | 3,1386    | 4133100     |
| PSMD6          | Q15008      | 26S proteasome non-ATPase regulatory subunit 6                          | 9               | 27,8                  | 2,9424    | 2199000     |
| SLC25A5        | P05141      | ADP/ATP translocase 2                                                   | 4               | 46,3                  | 2,9396    | 7577900     |
| CDC2           | P06493      | Cell division control protein 2 homolog                                 | 3               | 12,9                  | 2,8838    | 381250      |
| PSMD3          | O43242      | 26S proteasome non-ATPase regulatory subunit 3                          | 6               | 12,9                  | 2,845     | 1072400     |
| C14orf145      | Q6ZU80      | Uncharacterized protein C14orf145                                       | 26              | 26                    | 2,775     | 6507100     |
| BCLAF1         | Q9NYF8      | Bcl-2-associated transcription factor 1                                 | 2               | 6,1                   | 2,7631    | 461620      |
| ACTN1          | P12814      | ACTN1 protein;Alpha-actinin-1                                           | 24              | 33,3                  | 2,7362    | 2734900     |
| VCP            | P55072      | Transitional endoplasmic reticulum ATPase                               | 2               | 3,7                   | 2,718     | 94480       |
| TUBB           | P07437      | Tubulin beta chain                                                      | 10              | 31,3                  | 2,712     | 4185400     |
| RPS16          | P62249      | RPS16 protein                                                           | 3               | 18,4                  | 2,6838    | 265480      |
| HNRNPC;HNRPC   | P07910      | Heterogeneous nuclear ribonucleoproteins C1/C2                          | 9               | 26,5                  | 2,623     | 4029500     |
| PRKDC          | P78527      | DNA-dependent protein kinase catalytic subunit                          | 17              | 5                     | 2,5587    | 1728900     |
| MAGED1         | Q9Y5V3      | Melanoma-associated antigen D1;MAGE-D1 antigen                          | 3               | 4,1                   | 2,555     | 544220      |
| RPL10          | P27635      | Ribosomal protein L10                                                   | 6               | 24,3                  | 2,5515    | 2168700     |
| RPS11          | P62280      | 40S ribosomal protein S11                                               | 11              | 62                    | 2,5078    | 7270100     |
| HNRNPL;HNRPL   | P14866      | Heterogeneous nuclear ribonucleoprotein L                               | 2               | 7,1                   | 2,4448    | 180740      |
| AHNAK          | Q09666      | Neuroblast differentiation-associated protein AHNAK                     | 3               | 3,3                   | 2,4253    | 474050      |
| PGAM5          | Q96HS1      | Phosphoglycerate mutase family member 5;Bcl-XL-binding protein v68      | 3               | 8,7                   | 2,4212    | 279720      |
| SMARCA2        | P51531      | Probable global transcription activator SNF2L2                          | 4               | 13,2                  | 2,4183    | 321390      |
| ERH            | P84090      | Enhancer of rudimentary homolog                                         | 5               | 51                    | 2,4071    | 6174500     |
| ARMS           | Q9ULH0      | Ankyrin repeat-rich membrane spanning protein                           | 15              | 8,8                   | 2,3827    | 2478000     |
| ODF2           | Q5BJF6      | Outer dense fiber protein 2                                             | 12              | 17,1                  | 2,3489    | 949610      |
| THRAP3;TRAP150 | Q9Y2W1      | Thyroid hormone receptor-associated protein 3                           | 7               | 14,9                  | 2,2423    | 963170      |
| PSMD13         | Q9UNM6      | 26S proteasome non-ATPase regulatory subunit 13                         | 9               | 26,7                  | 2,2115    | 1592700     |
| SNRNP          | P14678      | Small nuclear ribonucleoprotein-associated proteins B and B'            | 5               | 13,5                  | 2,2042    | 1432000     |
| CEP192         | Q8TEP8      | Centrosomal protein of 192 kDa                                          | 7               | 3,9                   | 2,1847    | 206740      |

|                            |        |                                                                              |    |      |        |          |
|----------------------------|--------|------------------------------------------------------------------------------|----|------|--------|----------|
| CEP192                     | Q8TEP8 | Centrosomal protein of 192 kDa                                               | 7  | 3,9  | 2,1847 | 206740   |
| CPSF3;CPSF73               | Q9UKF6 | Cleavage and polyadenylation specificity factor subunit 3                    | 3  | 3,9  | 2,172  | 155710   |
| NONO                       | Q15233 | Non-POU domain-containing octamer-binding protein                            | 2  | 3,4  | 2,1383 | 164970   |
| SNRPE                      | P62304 | Small nuclear ribonucleoprotein E                                            | 3  | 38   | 2,127  | 1158800  |
| RPS8                       | P62241 | 40S ribosomal protein S8                                                     | 2  | 9,2  | 2,1227 | 284950   |
| CRYAB                      | P02511 | Alpha-crystallin B chain                                                     | 5  | 28   | 2,1176 | 602830   |
| CPSF2                      | Q9P210 | Cleavage and polyadenylation specificity factor subunit 2specificity factor  | 7  | 10,1 | 2,1149 | 1885400  |
| SNRPD1                     | P62314 | Small nuclear ribonucleoprotein Sm D1                                        | 4  | 29,5 | 2,1125 | 3027200  |
| NES                        | P48681 | Nestin                                                                       | 7  | 5,4  | 2,1061 | 521030   |
| RPS6                       | P62753 | 40S ribosomal protein S6                                                     | 2  | 8    | 2,1005 | 1326500  |
| PHB                        | P35232 | Prohibitin                                                                   | 2  | 11   | 2,0867 | 222650   |
| RPL23                      | P62829 | 60S ribosomal protein L23                                                    | 6  | 49,3 | 2,0801 | 6558700  |
| SNRPA                      | P09012 | U1 small nuclear ribonucleoprotein A                                         | 3  | 13,1 | 2,0553 | 1120500  |
| SNRPD3                     | P62318 | Small nuclear ribonucleoprotein Sm D3                                        | 3  | 22,9 | 2,0303 | 3728700  |
| DYNLL1                     | P63167 | Dynein light chain 1, cytoplasmic                                            | 2  | 20,2 | 2,0247 | 165010   |
| RPS27                      | P42677 | 40S ribosomal protein S27                                                    | 2  | 39,3 | 2,0206 | 2477900  |
| RPS15A                     | P62244 | 40S ribosomal protein S15a                                                   | 5  | 35,4 | 2,0098 | 1582700  |
| CPSF1;CPSF160              | Q10570 | Cleavage and polyadenylation specificity factor subunit 1                    | 28 | 22,3 | 1,9554 | 12720000 |
| MYH10                      | P35580 | Myosin-10                                                                    | 11 | 17,2 | 1,936  | 1770700  |
| SLC25A3                    | Q00325 | Phosphate carrier protein, mitochondrial                                     | 2  | 5,2  | 1,9244 | 150070   |
| RPL35A;GIG33               | P18077 | 60S ribosomal protein L35a                                                   | 2  | 19,1 | 1,9188 | 433950   |
| RPL18A                     | Q02543 | 60S ribosomal protein L18a                                                   | 3  | 17   | 1,9125 | 259600   |
| SNRPD2                     | P62316 | Small nuclear ribonucleoprotein Sm D2;snRNP core protein D2                  | 7  | 55,1 | 1,909  | 3895800  |
| TCOF1                      | Q13428 | Treacle protein;Treacher Collins syndrome protein                            | 5  | 4,2  | 1,9083 | 666670   |
| PHB2                       | Q99623 | Prohibitin-2                                                                 | 2  | 7,7  | 1,9024 | 22974    |
| RPL19                      | P84098 | 60S ribosomal protein L19                                                    | 4  | 20,9 | 1,8814 | 1009700  |
| PRDX1                      | Q06830 | Peroxisiredoxin-1                                                            | 3  | 15,6 | 1,8731 | 756900   |
| CAPZA1                     | P52907 | F-actin-capping protein subunit alpha-1                                      | 2  | 11,5 | 1,8715 | 136010   |
| EEF1A1                     | P68104 | Elongation factor 1-alpha 1                                                  | 4  | 11,9 | 1,7968 | 1857800  |
| SON                        | P18583 | SON protein                                                                  | 5  | 2,6  | 1,7954 | 1134400  |
| RPLP0                      | P05388 | 60S acidic ribosomal protein P0                                              | 4  | 19,9 | 1,7799 | 397940   |
| H2AFZ;H2AZ                 | P0C055 | Histone H2A.Z                                                                | 2  | 31,2 | 1,7758 | 24681000 |
| FLNA                       | P21333 | Filamin-A                                                                    | 17 | 11,6 | 1,7751 | 3018500  |
| RPS9                       | P46781 | 40S ribosomal protein S9                                                     | 9  | 40,2 | 1,7605 | 1770400  |
| SFRS10;TRA2B               | P62995 | Splicing factor, arginine/serine-rich 10 (Transformer 2 homolog, Drosophila) | 2  | 8    | 1,7589 | 348010   |
| RPL12                      | P30050 | 60S ribosomal protein L12                                                    | 4  | 40   | 1,748  | 259850   |
| RPS14                      | P62263 | 40S ribosomal protein S14                                                    | 3  | 22,5 | 1,7157 | 2671300  |
| DHX15                      | O43143 | Putative pre-mRNA-splicing factor ATP-dependent RNA helicase DHX15           | 4  | 5,8  | 1,6883 | 804320   |
| HNRNPU                     | Q00839 | Heterogeneous nuclear ribonucleoprotein U (Scaffold attachment factor 1)     | 9  | 15,2 | 1,6782 | 4381200  |
| HNRNPF;HNRPF               | P52597 | Heterogeneous nuclear ribonucleoprotein F                                    | 2  | 13,5 | 1,6759 | 3242300  |
| HIST1H1C;H1F2              | P16403 | Histone H1.2                                                                 | 3  | 18,3 | 1,6654 | 706140   |
| PRPF8;PRPC8                | Q6P2Q9 | Pre-mRNA-processing-splicing factor 8                                        | 7  | 2,7  | 1,6585 | 1172900  |
| HIST1H4A;H4/A;H4FA;HIST1H4 | P62805 | Histone H4                                                                   | 8  | 59,2 | 1,6565 | 20986000 |
| EFTUD2                     | Q15029 | 116 kDa U5 small nuclear ribonucleoprotein component                         | 6  | 7,6  | 1,6418 | 1291000  |
| FBL                        | P22087 | rRNA 2'-O-methyltransferase fibrillar                                        | 5  | 17,1 | 1,5973 | 755820   |
| TAF8                       | Q7Z7C8 | Transcription initiation factor TFIID subunit 8                              | 4  | 17   | 1,583  | 400000   |
| HNRNPM;HNRPM               | P52272 | Heterogeneous nuclear ribonucleoprotein M                                    | 3  | 9,7  | 1,5652 | 691950   |
| DDX5                       | P17844 | Probable ATP-dependent RNA helicase DDX5                                     | 8  | 30   | 1,527  | 6114200  |
| ASCC3L1;HELIC2             | O75643 | U5 small nuclear ribonucleoprotein 200 kDa helicase                          | 25 | 14,7 | 1,52   | 5070900  |

1282

1283

1284 **Table S2: List of the PA28 $\gamma$  interaction partners identified in endogenous PA28 $\gamma$  SILAC IP**

1285 **(MG132-treated cells).** Only proteins identified with a significant H/L SILAC ratio (H/L ratio >

1286 1.5) and containing at least two unique peptides identified are listed in this table. Proteins are

1287 classified by descending order for the H/L ratio.

1288

1289

**Table S3**

| Gene names                                                                                                                                                                                                                                                                                                            | Protein IDs   | Protein names                                                           | Unique peptides | Sequence coverage [%] | Ratio H/L | Intensity H |
|-----------------------------------------------------------------------------------------------------------------------------------------------------------------------------------------------------------------------------------------------------------------------------------------------------------------------|---------------|-------------------------------------------------------------------------|-----------------|-----------------------|-----------|-------------|
| GFP                                                                                                                                                                                                                                                                                                                   | Q9U6Y5        | Green Fluorescent Protein                                               | 11              | 53                    | 44,917    | 15118000000 |
| UBB;RPS27A;UBC;UBA52;UBA53;UBA54;UBA55;UBA56;UBA57;UBA58;UBA59;UBA60;UBA61;UBA62;UBA63;UBA64;UBA65;UBA66;UBA67;UBA68;UBA69;UBA70;UBA71;UBA72;UBA73;UBA74;UBA75;UBA76;UBA77;UBA78;UBA79;UBA80;UBA81;UBA82;UBA83;UBA84;UBA85;UBA86;UBA87;UBA88;UBA89;UBA90;UBA91;UBA92;UBA93;UBA94;UBA95;UBA96;UBA97;UBA98;UBA99;UBA100 | J3QS39;J3QTR3 | Ubiquitin-60S ribosomal protein L40;Ubiquitin;60S ribosomal protein L40 | 4               | 50,5                  | 26,981    | 265340000   |
| PSME3                                                                                                                                                                                                                                                                                                                 | P61289        | Proteasome activator complex subunit 3                                  | 28              | 86,2                  | 16,491    | 36430000000 |
| FAM192A;NIP30                                                                                                                                                                                                                                                                                                         | Q9GZU8        | Protein FAM192A                                                         | 12              | 63,5                  | 15,779    | 182930000   |
| PSMA7;PSMA8                                                                                                                                                                                                                                                                                                           | O14818;Q8TAA3 | Proteasome subunit alpha type-7;Proteasome subunit alpha type-7-like    | 2               | 12,9                  | 3,7274    | 3118600     |
| COIL                                                                                                                                                                                                                                                                                                                  | P38432        | Coilin                                                                  | 3               | 5,9                   | 2,6545    | 3095400     |
| VDAC2                                                                                                                                                                                                                                                                                                                 | P45880        | Voltage-dependent anion-selective channel protein 2                     | 3               | 16,5                  | 1,6517    | 6038600     |
| RCC2                                                                                                                                                                                                                                                                                                                  | Q9P258        | Protein RCC2                                                            | 2               | 5,2                   | 1,5253    | 6408700     |
| CAPZA1                                                                                                                                                                                                                                                                                                                | P52907        | F-actin-capping protein subunit alpha-1                                 | 6               | 46,2                  | 1,4971    | 53597000    |
| CAPZB                                                                                                                                                                                                                                                                                                                 | P47756        | F-actin-capping protein subunit beta                                    | 4               | 17,3                  | 1,4463    | 9878300     |
| KPNB1                                                                                                                                                                                                                                                                                                                 | Q14974        | Importin subunit beta-1                                                 | 2               | 3,2                   | 1,4106    | 2802800     |

1290

1291

1292 **Table S3: List of the PA28 $\gamma$  interaction partners identified in GFP-PA28 $\gamma$  SILAC IP.** Only  
 1293 proteins identified with a significant H/L SILAC ratio (H/L ratio > 1.4) and containing at least  
 1294 two unique peptides identified are listed in this table. Proteins are classified by descending  
 1295 order for the H/L ratio.

1296

1297
